## ***Dopaminergic challenge dissociates learning from primary versus secondary sources of information***

Rybicki, A. J.<sup>1</sup>, Sowden, S. L.<sup>1</sup>, Schuster, B. A.<sup>1</sup> & Cook, J. L.<sup>1</sup>.

*1. School of Psychology, University of Birmingham, Birmingham, B15 2TT, UK.*

Correspondence concerning this article should be addressed to Alicia Rybicki, School of Psychology, University of Birmingham, Birmingham, B15 2TT, UK.

Phone: +44 7751865621; Email: [axr783@bham.ac.uk](mailto:axr783@bham.ac.uk)

1 **Summary**

2 Some theories of human cultural evolution posit that humans have social-specific learning  
3 mechanisms that are adaptive specialisations moulded by natural selection to cope with the  
4 pressures of group living. However, the existence of neurochemical pathways that are specialised for  
5 learning from social information and from individual experience is widely debated. Cognitive  
6 neuroscientific studies present mixed evidence for social-specific learning mechanisms: some studies  
7 find dissociable neural correlates for social and individual learning whereas others find the same  
8 brain areas and, dopamine-mediated, computations involved in both. Here we demonstrate that,  
9 like individual learning, social learning is modulated by the dopamine D2 receptor antagonist  
10 haloperidol when social information is the primary learning source, but not when it comprises a  
11 secondary, additional element. Two groups (total N = 43) completed a decision-making task which  
12 required primary learning, from own experience, and secondary learning from an additional source.  
13 For one group the primary source was social, and secondary was individual; for the other group this  
14 was reversed. Haloperidol affected primary learning irrespective of social/individual nature, with no  
15 effect on learning from the secondary source. Thus, we illustrate that neurochemical mechanisms  
16 underpinning learning can be dissociated along a primary-secondary but not a social-individual axis.  
17 These results resolve conflict in the literature and support an expanding field showing that, rather  
18 than being specialised for particular inputs, neurochemical pathways in the human brain can process  
19 both social and non-social cues and arbitrate between the two depending upon which cue is  
20 primarily relevant for the task at hand.

21

22 **Keywords**

23 social learning, dopamine, reward learning, reinforcement learning, haloperidol

## 24 Introduction

25

26 The complexity and sophistication of human learning is increasingly appreciated. Enduring  
27 theoretical models illustrate that learners utilise “prediction errors” to refine their predictions of  
28 future states (e.g. Rescorla-Wagner and temporal difference models; O’Doherty et al., 2003;  
29 Rescorla & Wagner, 1972; Schultz et al., 1997; Sutton & Barto, 2018). An explosion of studies,  
30 however, illustrates that this simple mechanism lies at the heart of more complex and sophisticated  
31 systems that enable humans (and other species) to learn from, keep track of the utility of, and  
32 integrate information from, multiple learning sources (Behrens et al., 2009; Biele et al., 2009; Li et  
33 al., 2011) meaning that one can learn from many sources of information simultaneously (Daw et al.,  
34 2006). Such complexity enables individuals to, for example, rank colleagues according to the utility  
35 of their advice and learn primarily from the top-ranked individual (Kendal et al., 2018; Laland, 2004;  
36 Morgan et al., 2012; Rendell et al., 2011) whilst also tracking the evolving utility of advice from  
37 others (Behrens et al., 2008; Biele et al., 2011). Recent studies have further revealed that learning  
38 need not rely solely on directly experienced associations, since one can also learn via inference  
39 (Bromberg-Martin et al., 2010; Dolan & Dayan, 2013; Jones et al., 2012; Langdon et al., 2018; Moran  
40 et al., 2021; Sadacca et al., 2016; Sharpe & Schoenbaum, 2018). This growing appreciation of the  
41 complexity and sophistication of human learning may help to explain contradictory findings in  
42 various fields. Here we focus on the field of social learning.

43

44 The existence in the human brain of neural and/or neurochemical pathways that are specialised for  
45 learning from social information and from individual experience respectively is the topic of much  
46 debate (Heyes, 2012; Heyes & Pearce, 2015). Indeed, the claim that humans have *social-specific*  
47 *learning mechanisms* that are adaptive specialisations moulded by natural selection to cope with the  
48 pressures of group living, lies at the heart of some theories of cultural evolution (Kendal et al., 2018;  
49 Morgan et al., 2012; Templeton et al., 1999). Since cultural evolution is argued to be specific to  
50 humans (Richerson & Boyd, 2005), establishing whether humans do indeed possess social-specific  
51 learning mechanisms has attracted many scholars with its promise of elucidating the key ingredient  
52 that “makes us human”.

53

54 Cognitive neuroscience offers tools that are ideally suited to investigating whether the mechanisms  
55 underpinning social learning (learning from others), do indeed differ from those that govern learning  
56 from one’s individual experience (individual learning). Cognitive neuroscientific studies, however,  
57 present mixed evidence for *social-specific* learning mechanisms. Some studies find dissociable neural

58 correlates for social and individual learning (Apps et al., 2016; Behrens et al., 2008; Hill et al., 2016;  
59 Zhang & Gläscher, 2020). For example, a study by Behrens and colleagues (2008) reported that  
60 whilst individual learning was associated with activity in dopamine-rich regions such as the striatum  
61 that are classically associated with reinforcement learning, social learning was associated with  
62 activity in a dissociable network that instead included the anterior cingulate cortex gyrus (ACCG) and  
63 temporoparietal junction. Further supporting this dissociation, studies have revealed correlations  
64 between personality traits, such as social dominance (Cook et al., 2014) and dimensions of  
65 psychopathy (Brazil et al., 2013) and social, but not individual, learning; as well as atypical social, but  
66 not individual, prediction error-related signals in the ACCG in autistic individuals (Balsters et al.,  
67 2017). Together these studies support the existence of *social-specific* learning mechanisms. In  
68 contrast, other studies have reported that the same computations, based on the calculation of  
69 prediction error, are involved in both social and individual learning (Diaconescu et al., 2014), and  
70 that social learning is associated with activity in dopamine-rich brain regions typically linked to  
71 individual learning (Biele et al., 2009; Braams et al., 2014; Campbell-Meiklejohn et al., 2010; Delgado  
72 et al., 2005; Diaconescu et al., 2017; Klucharev et al., 2009). Diaconescu and colleagues (2017), for  
73 example, observed that social learning-related prediction errors covaried with naturally occurring  
74 genetic variation that affected the function of the dopamine system. Further supporting this overlap  
75 between social and individual learning, behavioural studies have observed that social and individual  
76 learning are subject to the same contextual influences. For example, Tarantola and colleagues (2017)  
77 observed that prior preferences bias social learning, just as they do individual learning. Such findings  
78 promote the view that ‘domain-general’ learning mechanisms underpin social learning: we learn  
79 from other people in the same way that we learn from any other stimulus in our environment  
80 (Heyes, 2012; Heyes & Pearce, 2015). That is, there are no *social-specific* learning mechanisms.

81

82 One potential resolution to this conflict in the literature hinges on i) an appreciation of the  
83 complexity and sophistication of human learning systems and ii) a difference in study design  
84 between tasks that have, and have not, found evidence of *social-specific mechanisms*. In studies,  
85 that have linked social learning with the dopamine-rich circuitry typically associated with individual  
86 learning (and which are therefore consistent with the domain general view), participants have been  
87 encouraged to learn *primarily* from social information. Indeed, in many cases the social source has  
88 been the sole information source (Campbell-Meiklejohn et al., 2017; Diaconescu et al., 2017;  
89 Klucharev et al., 2009). For example, in the paradigm employed by Diaconescu and colleagues (2014,  
90 2017), participants were required to choose between a blue and green stimulus and were provided  
91 with social advice which was sometimes valid and sometimes misleading; on each trial, participants

92 received information about the time-varying probability of reward associated with the blue and  
93 green stimuli, thus participants did not have to rely on their own individual experience of blue/green  
94 reward associations and could fully dedicate themselves to social learning. That is, participants did  
95 not learn from multiple sources (i.e., social information *and* individual experience); participants *only*  
96 engaged in social learning. In contrast, in studies where social learning has been associated with  
97 neural correlates outside of the dopamine-rich regions classically linked to individual learning (and  
98 which are therefore consistent with the domain specific view), social information has typically  
99 comprised a secondary, additional source (Behrens et al., 2008; Cook et al., 2014). Typically, the non-  
100 social (individual) information is presented first to participants, represented in a highly salient form,  
101 and is directly related to the feedback information. The social information, in contrast, is presented  
102 second, is typically less salient in form, and is not directly related to the feedback information. For  
103 example, in the Behrens et al. study (2008) (and in our own work employing this paradigm (Cook et  
104 al., 2014, 2019)) participants were required to choose between two, highly salient, blue and green  
105 boxes to accumulate points. The boxes were the first stimuli that participants saw on each trial.  
106 Outcome information came in the form of a blue or green indicator thus *primarily* informing  
107 participants about whether they had made the correct choice on the current trial (i.e., if the  
108 outcome indicator was blue, then the blue box was correct). In addition, each trial also featured a  
109 thin red frame, which represented social information, surrounding one of the two boxes. The red  
110 frame was the second stimulus that participants saw on each trial and indirectly informed  
111 participants about the veracity of the frame: if the outcome was blue AND the frame surrounded the  
112 blue box, then the frame was correct. In such paradigms, participants must learn from multiple  
113 sources of information with one source taking primary status over the other. Consequently, in  
114 studies that have successfully dissociated social and individual learning the two forms of learning  
115 differ both in terms of social nature (social or non-social) and rank (primary versus secondary status).  
116 Thus, it is unclear which of these two factors accounts for the dissociation.

117

118 The current study tests whether social and individual learning share common neurochemical  
119 mechanisms when they are matched in terms of (primary versus secondary) status. Given its  
120 acclaimed role in learning (Glimcher & Bayer, 2005; Schultz, 2007), we focus specifically on the role  
121 of the neuromodulator dopamine. Drawing upon recent studies illustrating the complexity and  
122 sophistication of human learning (Daw et al., 2005; Gläscher et al., 2011; Moran et al., 2021) we  
123 hypothesise that pharmacological modulation of the human dopamine system will dissociate  
124 learning from two sources of information along a primary versus secondary, but not along a social  
125 versus individual axis. In other words, we hypothesise that social learning relies upon the dopamine-

126 rich mechanisms that also underpin individual learning when social information is the primary  
127 source, but not when it comprises a secondary, additional element. Such a finding would offer a  
128 potential resolution to the aforementioned debate concerning the existence of *social-specific*  
129 learning mechanisms.

130

131 Preliminary support for our hypothesis comes from three lines of work. First, studies have  
132 convincingly argued for flexibility within learning systems. For example, in a study by Daw and  
133 colleagues (2006), participants tracked the utility of four uncorrelated bandits, with particular brain  
134 regions - such as the ventromedial prefrontal cortex - consistently representing the value of the top-  
135 ranked bandit, even though the identity of this bandit changed over time. Second, studies are  
136 increasingly illustrating the flexibility of social brain networks (Ereira et al., 2020; Garvert et al.,  
137 2015). The medial prefrontal cortex (mPFC), for example, is not - as was once thought - specialised  
138 for representing the self; if the concept of 'other' is primarily relevant for the task at hand, then the  
139 mPFC will prioritise representation of other over self (Cook, 2014; Nicolle et al., 2012). Finally, in a  
140 recent study (Cook et al., 2019), we provided preliminary evidence of a catecholaminergic (i.e.  
141 dopaminergic and noradrenergic) dissociation between learning from primary and secondary, but  
142 not social and individual, sources of information. In this work (Cook et al., 2019) we employed a  
143 between-groups design, wherein both groups completed a version of the social learning task  
144 adapted from Behrens and colleagues (2008; described above). For one group the secondary source  
145 was social in nature (social group). For the non-social group, the secondary source comprised a  
146 system of rigged roulette wheels and was thus non-social in nature. We observed that, in  
147 comparison to placebo, the catecholaminergic transporter blocker methylphenidate only affected  
148 learning from the primary source - which, in this paradigm, always comprised participant's own  
149 individual experience. Methylphenidate did not affect learning from the secondary source,  
150 irrespective of its social or non-social nature. That is, we found positive evidence supporting a  
151 dissociation between primary and secondary learning but no evidence to support a distinction  
152 between learning from social and non-social sources. Nevertheless, since we did not observe an  
153 effect of methylphenidate on learning from the (social or non-social) secondary source of  
154 information this study was unable to provide positive evidence of shared mechanisms for learning  
155 from social and non-social sources. If it is truly the case that domain-general (neurochemical)  
156 mechanisms underpin social learning, it should follow that pharmacological manipulations that  
157 affect individual learning when individual information is the primary source also affect social learning  
158 when social information is the primary source.

159 The current (pre-registered) experiment tested this hypothesis by orthogonalizing social versus  
160 individual and primary versus secondary learning. We perturbed learning using the dopamine D2  
161 receptor antagonist haloperidol, in a double-blind, counter-balanced, placebo-controlled design. To  
162 test whether pharmacological manipulation of dopamine dissociates learning along a primary-  
163 secondary and/or a social-individual axis, we developed a novel between-groups manipulation  
164 wherein one group of participants learned primarily from social information and could supplement  
165 this learning with their own individual experience, and a second group learned primarily from  
166 individual experience and could supplement this learning with socially learned information. To  
167 foreshadow our results, we demonstrate that haloperidol specifically affects learning from the  
168 primary (not secondary) source of information. Bayesian statistics confirmed that the effects of  
169 haloperidol were comparable between the groups thus, haloperidol affected individual learning  
170 when individual information was the primary source and, to the same extent, social learning when  
171 social information was the primary source. Our data support an expanding field showing that, rather  
172 than being fixedly specialised for particular inputs, neurochemical pathways in the human brain can  
173 process both social and non-social cues and arbitrate between the two depending upon which cue is  
174 primarily relevant for the task at hand (Cook, 2014; Garvert et al., 2015; Nicolle et al., 2012).

175

## 176 **Results**

177

178 Participants ( $n = 43$ ; aged 19-38, mean (standard error)  $\bar{x}(\sigma_{\bar{x}}) = 25.950 (0.970)$ ; 24 males, 19  
179 females; see Methods) completed an adapted version of the behavioural task originally developed  
180 by Behrens and colleagues (Behrens et al., 2008). Participants were randomly allocated to one of  
181 two groups. Participants in the **individual-primary group** ( $n = 21$ ) completed the classic version of  
182 this task (Figure 1A (Behrens et al., 2008)) in which they were required to make a choice between a  
183 blue and green box in order to win points. A red frame (the social information), which represented  
184 the most popular choice made by a group of four participants who had completed the task  
185 previously, surrounded either the blue or green box on each trial and participants could use this to  
186 help guide their choice. The actual probability of reward associated with the blue and green boxes  
187 and the probability that the red frame surrounded the correct box varied according to uncorrelated  
188 pseudo-randomised schedules (Figure S1; Appendix 2). For the individual-primary group, the  
189 individual information (blue and green stimuli) was primary, and the social information (red  
190 stimulus) was secondary on the basis that the blue/green stimuli appeared first on the screen, were  
191 highly salient (large boxes versus a thin frame) and were directly related to the feedback  
192 information. That is, after making their selection, participants saw a small blue or green box which

193 *primarily* informed them whether a blue or green choice had been rewarded on the current trial.  
194 From this information the participant could, *secondarily*, infer whether the social information (red  
195 frame) was correct or incorrect.

196

197 Our **social-primary group** (n = 22; groups matched on age, gender, body mass index (BMI) and verbal  
198 working memory span (Table 1)) completed an adapted version of this task (Figure 1B) wherein the  
199 social information (red stimulus) was primary, and the individual information (blue/green stimuli)  
200 was secondary. Participants first saw two placeholders; one empty and one containing a red box  
201 which indicated the social information. Subsequently, a thin green and a thin blue frame appeared  
202 around each placeholder. Participants were told that the red box represented the group's choice.  
203 They were then required to choose whether to go with the social group (red box) or not. After  
204 making their choice a tick or cross appeared which *primarily* informed participants whether going  
205 with the social information was the correct option. From this they could, *secondarily*, infer whether  
206 the blue or green frame was correct. Consequently, for the social-primary group the social  
207 information was primary on the basis that it appeared first on the screen, was highly salient (a large  
208 red box versus thin green/blue frames) and was directly related to the feedback information.

209

210 Participants in both the individual-primary and social-primary groups performed 120 trials of the  
211 task on each of two separate study days. To perturb learning, on one day participants took 2.5mg of  
212 haloperidol (HAL), previously shown to affect learning (Pessiglione et al., 2006) via multiple routes  
213 including perturbation of phasic dopamine signalling (Schultz, 2007; Schultz et al., 1997) facilitated  
214 by action at mesolimbic D2 receptors (Camps et al., 1989; Grace, 2002; Lidow et al., 1991). On the  
215 other day, they took a placebo (PLA) under double-blind conditions, with the order of the days  
216 counterbalanced. 43 participants took part in at least one study day, 33 participants completed both  
217 study days. 2 participants performed at below chance level accuracy and were excluded from further  
218 analysis. We present an analysis of data from the 31 participants who completed both study days  
219 with above chance accuracy (Table 1) in the main text of this manuscript, which we complement  
220 with a full analysis of all 41 datasets in Appendix 4i.



**Figure 1. Behavioural task**

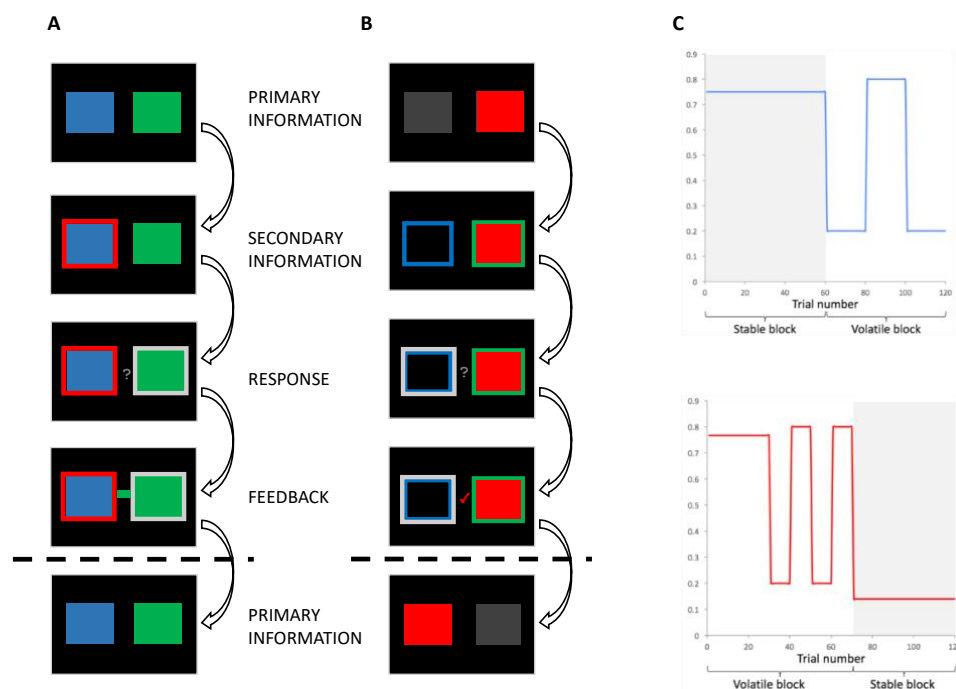

**Figure 1. Behavioural task. A. Individual-primary group.** Participants selected between a blue and a green box to gain points. On each trial, the blue and green boxes were presented first. After 1-4 seconds (s), one of the boxes was highlighted with a red frame, representing the social information. After 0.5–2s, a question mark appeared, indicating that participants were able to make their response. Response was indicated by a silver frame surrounding their choice. After a 1-3s interval, participants received feedback in the form of a green or blue box in the middle of the screen. **B. Social-primary group.** Participants selected between going with, or against a red box, which represented the social information. On each trial, the red box was displayed. After 1-4s, blue and green frames appeared. After 0.5–2s, a question mark appeared, indicating that participants were able to make their response. Response was indicated by a silver frame surrounding their choice. After a 1-3s interval, participants received feedback in the form of a tick or a cross. This feedback informed participants if going with the group was correct or incorrect, from this feedback participants could infer whether the blue or green frame was correct. **C. Example of pseudo-randomised probabilistic schedule.** The probability of reward varied according to probabilistic schedules, including stable and volatile blocks for both the probability of the blue box/frame being correct (top) and the probability of the red (social) box/frame being correct (bottom).

221 ***Social information is the primary source of learning for participants in the social-primary group***  
 222 Our novel manipulation orthogonalized primary versus secondary and social versus individual  
 223 learning. To validate our manipulation, we tested whether participants in both the individual-  
 224 primary and social-primary group learned in a more optimal fashion from the primary versus  
 225 secondary source of information in our placebo condition. For this validation analysis we used a  
 226 Bayesian learner model to create two optimal models (1) an optimal primary learner, and (2) an  
 227 optimal secondary learner (Methods). Subsequently we regressed both models against participants'

228 choice data, resulting in two  $\beta_{\text{optimal}}$  values capturing the extent to which a participant made choices  
229 according to the optimal primary, and optimal secondary learner models respectively.  $\beta_{\text{optimal}}$  values  
230 were submitted to a repeated-measures ANOVA with factors information source (primary,  
231 secondary) and group (social-primary, individual-primary), revealing main effects of information  
232 source and group.  $\beta_{\text{optimal}}$  values were significantly higher for the primary information ( $\bar{x}(\sigma_{\bar{x}}) = 0.872$   
233 (0.101)), compared with secondary information source ( $\bar{x}(\sigma_{\bar{x}}) = 0.438$  (0.101);  $t(30) = 2.568$ ,  $p_{\text{holm}} =$   
234 0.016).  $\beta_{\text{optimal}}$  values were also significantly higher for the social-primary ( $\bar{x}(\sigma_{\bar{x}}) = 0.833$  (0.078)),  
235 compared with the individual-primary group ( $\bar{x}(\sigma_{\bar{x}}) = 0.477$  (0.078);  $t(30) = 3.228$ ,  $p_{\text{holm}} = 0.003$ )  
236 (Figure 2). Crucially, we did not observe a significant interaction between information and group ( $F$   
237 (1,29) = 0.067,  $p = 0.797$ ), meaning that participants' choices were more influenced by the primary  
238 information source, regardless of whether it was social or individual in nature. Furthermore,  $\beta_{\text{optimal}}$   
239 values for primary information did not differ between groups ( $t(29) = -1.211$ ,  $p = 0.236$ ). Note that,  
240  $\beta_{\text{optimal}}$  weights for both information sources were significantly greater than zero (primary:  $t(30) =$   
241 5.534,  $p < 0.001$ ; secondary:  $t(30) = 4.789$ ,  $p < 0.001$ ) thus our optimal models of information use  
242 explained a significant amount of variance in the use of both primary and secondary learning  
243 sources. These data show that, irrespective of social (or individual) nature, participants learned in a  
244 more optimal fashion from the "primary" (relative to secondary) learning source, which was first in  
245 the temporal order of events, highly salient and directly related to the reward feedback.

**Figure 2.** Beta weights ( $\beta_{\text{optimal}}$ )

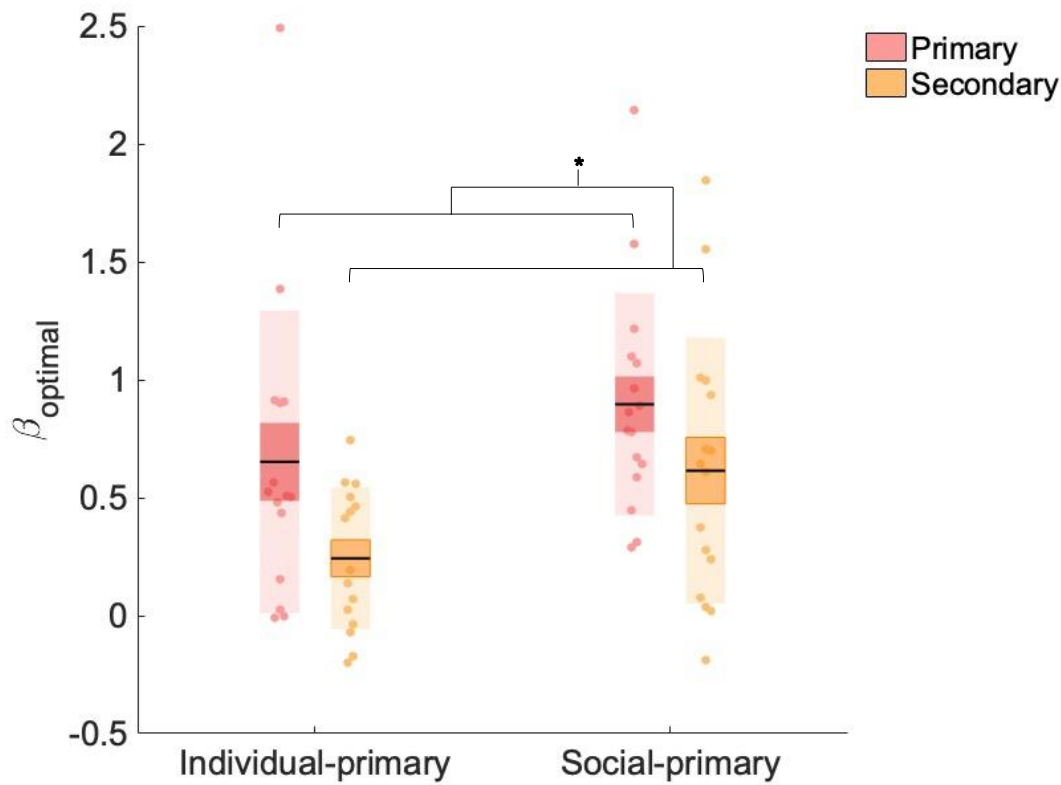

**Figure 2.** Beta weights ( $\beta_{\text{optimal}}$ ) for primary and secondary information. Data points indicate estimated  $\beta_{\text{optimal}}$  weights for individual participants ( $n = 31$ , placebo data), bold point indicates the mean, bold line indicates standard error of the mean (1 SEM), \* indicates statistical significance ( $p < 0.05$ ).

246 ***Haloperidol reduces the rate of learning from primary sources***

247 We hypothesed that both social and individual learning would be modulated by administration of  
248 the dopamine D2 receptor antagonist haloperidol when they were the *primary* source of learning,  
249 but not when they comprised the *secondary* source. To test this hypothesis we fitted an adapted  
250 Rescorla-Wagner (RW) learning model (Rescorla & Wagner, 1972) to participants' choice data,  
251 enabling us to estimate various parameters that index learning from primary and secondary sources  
252 of information, for HAL and PLA conditions, for participants in the social-primary and individual-  
253 primary groups. Our adapted RW model provided estimates, for each participant, of  $\alpha$ ,  $\beta$ , and  $\zeta$ . The  
254 learning rate ( $\alpha$ ) controls the weighting of prediction errors on each trial. A high  $\alpha$  favours recent  
255 over (outdated) historical outcomes, while a low  $\alpha$  suggests a more equal weighting of recent and  
256 more distant trials. Since our pseudo-random schedules included stable phases (where the reward  
257 probability associated with a particular option was constant for  $> 30$  trials), and volatile phases

258 (where reward probabilities changed every 10-20 trials),  $\alpha$  was estimated separately for volatile and  
259 stable phases (for both primary and secondary learning) to accord with previous research (Behrens  
260 et al., 2007; Cook et al., 2019; Manning et al., 2017).  $\beta$  captures the extent to which learned  
261 probabilities determine choice, with a larger  $\beta$  meaning that choices are more deterministic with  
262 regard to the learned probabilities.  $\zeta$  represents the relative weighting of primary and secondary  
263 sources of information, with higher values indicating a bias towards the over-weighting of secondary  
264 relative to primary (see Methods and Appendix 3 for further details of the model, model fitting and  
265 model comparison).

266

267 To test the hypothesis that haloperidol would affect learning from the primary information source  
268 only, regardless of its social/individual nature, we employed three separate linear mixed effects  
269 models, allowing analysis of the effects of fixed factors information source (primary, secondary),  
270 drug (HAL, PLA), environmental volatility (volatile, stable) and group (social-primary, individual-  
271 primary) on our three dependent variables ( $\alpha$ ,  $\beta$ ,  $\zeta$ ) while controlling for inter-individual differences.  
272 Including pseudo-randomisation schedule as a factor in all analyses did not change the pattern of  
273 results. A repeated measures ANOVA (RM-ANOVA) on mixed effects model coefficients revealed no  
274 main/interaction effect(s) on  $\beta$  or  $\zeta$  values (all  $p > 0.05$ ). In contrast, for  $\alpha$  we observed a drug by  
275 information interaction ( $F(1, 203) = 6.852$ ,  $p = 0.009$ , beta estimate ( $\bar{\alpha}(\sigma_{\bar{\alpha}}) = 0.026(0.010)$ ,  $t = 2.62$ ,  
276 confidence interval [CI] [0.010 – 0.050]) (Figure 3). There were no significant main effects of drug ( $F$   
277 (1, 258) = 0.084,  $p = 0.772$ ), group ( $F(1, 39) = 3.692$ ,  $p = 0.062$ ) or volatility ( $F(1, 258) = 0.084$ ,  $p =$   
278 0.772) on  $\alpha$  values, nor any other significant interactions involving drug (all  $p$ -values  $> 0.05$ , see  
279 Appendix 4v-vi for analysis including schedule, session and working memory). Planned contrasts  
280 showed that, whilst under PLA  $\alpha_{\text{primary}}$  ( $\bar{\alpha}(\sigma_{\bar{\alpha}}) = 0.451(0.025)$ ) was significantly greater than  $\alpha_{\text{secondary}}$   
281 ( $\bar{\alpha}(\sigma_{\bar{\alpha}}) = 0.370(0.025)$ ;  $z(30) = 2.861$ ,  $p = 0.004$ ), this was not the case under HAL ( $\alpha_{\text{primary}}$   $\bar{\alpha}(\sigma_{\bar{\alpha}}) =$   
282 0.393(0.025),  $\alpha_{\text{secondary}}$   $\bar{\alpha}(\sigma_{\bar{\alpha}}) = 0.417(0.025)$ ;  $z(30) = -0.843$ ,  $p = 0.400$ ). Furthermore,  $\alpha_{\text{primary}}$  was  
283 decreased under HAL relative to PLA ( $z(30) = -2.050$ ,  $p = 0.040$ ). Although  $\alpha_{\text{secondary}}$  was, in contrast,  
284 numerically increased under HAL ( $\bar{\alpha}(\sigma_{\bar{\alpha}}) = 0.417(0.025)$ ) relative to PLA ( $\bar{\alpha}(\sigma_{\bar{\alpha}}) = 0.370(0.025)$ ), this  
285 difference was not significant ( $z(30) = 1.654$ ,  $p = 0.098$ ). This drug x information interaction  
286 therefore illustrated that whilst haloperidol significantly reduced  $\alpha_{\text{primary}}$  it had no significant effect  
287 on  $\alpha_{\text{secondary}}$ . Furthermore, under PLA there was a significant difference between  $\alpha_{\text{primary}}$  and  $\alpha_{\text{secondary}}$ ,  
288 which was nullified by haloperidol administration. Consequently, under placebo participants' rate of  
289 learning was typically higher for learning from the primary relative to the secondary source,  
290 however, under the D2 receptor antagonist haloperidol the rate of learning from the primary source

291 was reduced and thus there was no significant difference in the rate of learning from primary and  
292 secondary sources.

**Figure 3.** Learning rate estimates

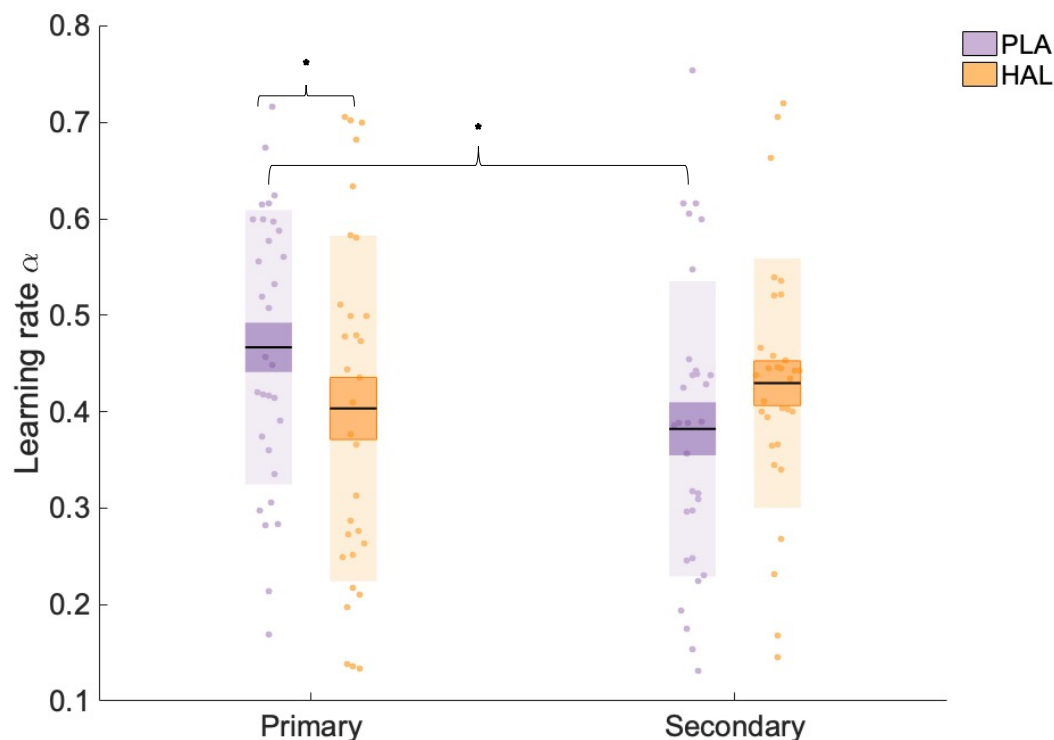

**Figure 3.** Learning rate ( $\alpha$ ) estimates for learning from primary and secondary information. There was a significant interaction between information and drug, with  $\alpha$  estimates significantly lower under haloperidol (orange), relative to placebo (purple), for primary information only. Data points indicate square-root transformed  $\alpha$  estimates for individual participants ( $n = 31$ ), boxes = standard error of the mean, shaded region = standard deviation, HAL = haloperidol, PLA = placebo, \* indicates statistical significance ( $p < 0.05$ ).

293 ***Haloperidol reduces the rate of learning from a primary source irrespective of its social or***  
294 ***individual nature***

295 Our primary hypothesis was that haloperidol would modulate the rate of learning from the primary  
296 source irrespective of its social or individual nature. This would be evidenced as an interaction  
297 between drug and (primary versus secondary) information source (see above) in the absence of an  
298 interaction between drug, information source and group (social-primary versus individual-primary).  
299 Crucially, we observed no significant interaction between drug, information source and group ( $F(1,$   
300  $234) = 0.029, p = 0.866$ ). To further assess whether drug effects on primary information differed as a  
301 function of group, results were also analysed within a Bayesian framework, using JASP software

302 (JASP Team (2020)). A Bayes exclusion factor ( $BF_{\text{excl}}$ ), representing the relative likelihood that a  
303 model without a drug x information x group interaction effect could best explain the observed data,  
304 was calculated (Dienes, 2014). Values of 3–10 are taken as moderate evidence in favour of the null  
305 hypotheses that there is no drug x information x group interaction (Lee & Wagenmakers, 2013) with  
306 values greater than 10 indicating strong evidence. The  $BF_{\text{excl}}$  value was equal to 7.516, providing  
307 moderate evidence in favour of the null hypotheses that there is no drug x information x group  
308 interaction. Consequently, results confirmed our hypothesis: haloperidol perturbed learning from  
309 the primary but not the secondary source, irrespective of social or individual nature.

310

### 311 **Haloperidol brings $\alpha_{\text{primary}}$ estimates within the optimal range**

312 To assess whether the effects of haloperidol on  $\alpha_{\text{primary}}$  are harmful or beneficial with respect to  
313 performance we first explored drug effects on accuracy (see Appendix 4ii for a detailed analysis  
314 including randomisation schedule). There was no significant difference in accuracy between  
315 haloperidol ( $\bar{x}(\sigma_{\bar{x}}) = 0.600 (0.013)$ ), and placebo ( $\bar{x}(\sigma_{\bar{x}}) = 0.611 (0.010)$ );  $F(1,29) = 0.904$ ,  $p = 0.349$ ,  
316  $\eta_p^2 = 0.030$  conditions.

317

318 The lack of a significant main effect of drug on accuracy was somewhat surprising given the  
319 significant (interaction) effect on learning rates, i.e., a decrease in  $\alpha_{\text{primary}}$  under haloperidol relative  
320 to placebo. To investigate whether haloperidol resulted in learning rates that were less, or  
321 alternatively more, optimal we compared our estimated  $\alpha$  values with optimal  $\alpha$  estimates. Since  
322 trial-wise outcomes were identical to those utilised by Cook et al (Cook et al., 2019), optimal values  
323 are also identical and are described here for completeness. An optimal learner model, with the same  
324 architecture and priors as the model employed in the current task, was fit to 100 synthetic datasets,  
325 resulting in average optimal learning rates:  $\alpha_{\text{optimal\_primary\_stable}} = 0.16$ ,  $\alpha_{\text{optimal\_primary\_volatile}} = 0.21$ ,  
326  $\alpha_{\text{optimal\_secondary\_stable}} = 0.17$ ,  $\alpha_{\text{optimal\_secondary\_volatile}} = 0.19$ . Scores representing the difference between  
327 (untransformed)  $\alpha$  estimates and optimal  $\alpha$  scores were calculated ( $\alpha_{\text{diff}} = \alpha - \alpha_{\text{optimal}}$ ). A linear  
328 mixed model analysis on  $\alpha_{\text{diff}}$  values with factors group, drug, volatility and information source and  
329 subject as a random factor, was conducted. A RM-ANOVA (factors: drug, information, volatility,  
330 group) on model coefficients revealed an interaction between drug and information source ( $F(1,$   
331  $203) = 4.895$ ,  $p = 0.028$ ) (Figure 4). Separate RM-ANOVAs were conducted for primary and secondary  
332 information. For primary information, a main effect of drug was observed on difference scores ( $F(1,$   
333  $29) = 51.740$ ,  $p < 0.001$ ,  $\eta_p^2 = 0.641$ ), with  $\alpha_{\text{diff\_primary}}$  significantly higher under PLA ( $\bar{x}(\sigma_{\bar{x}}) = 0.238$   
334  $(0.026)$ ) compared with HAL ( $\bar{x}(\sigma_{\bar{x}}) = 0.011 (0.026)$ ). For secondary information,  $\alpha_{\text{diff\_secondary}}$  did  
335 not differ between treatment conditions ( $p > 0.05$ ). In sum, learning rates for learning from the

336 primary source were higher than optimal under placebo, with  $\alpha_{diff\_primary}$  significantly differing  
337 from 0 (one-sample t test;  $t(30) = 2.377$ ,  $p = 0.024$ ). Haloperidol reduced learning rates that  
338 corresponded to learning from the primary source, thus bringing them within the optimal range,  
339 with  $\alpha_{diff\_primary}$  not significantly differing from 0 under haloperidol (one-sample t test;  $t(30) =$   
340  $0.412$ ,  $p = 0.683$ ). Consequently, under haloperidol relative to placebo, learning rates were *more*  
341 *optimal* when learning from primary sources.

**Figure 4.** Learning rate estimates compared with optimal learning rates.

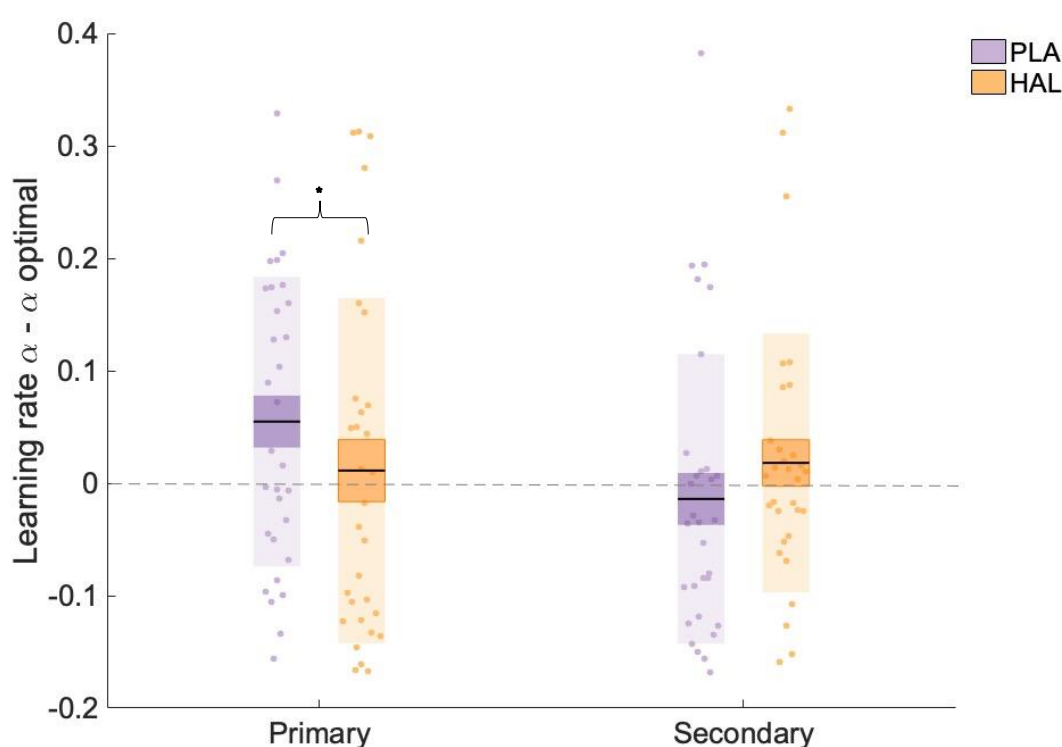

**Figure 4.** Learning rate estimates minus optimal learning rates. There was a significant interaction between information and drug, with  $\alpha_{primary}$  scores significantly higher than optimal estimates under placebo but not under haloperidol. Data points indicate  $\alpha - \alpha_{optimal}$  values for individual participants ( $n = 31$ ), boxes = standard error of the mean, shaded region = standard deviation, HAL = haloperidol, PLA = placebo, \* indicates statistical significance ( $p < 0.05$ ).

342 To explore whether  $\alpha$  values were in some way related to accuracy scores we used two separate  
343 backwards regression models, for PLA and HAL conditions separately, with  $\alpha_{primary}$  and  $\alpha_{secondary}$  as  
344 predictors and accuracy as the dependent variable (see Appendix 4iii for details of a regression  
345 model with *all* model parameters). PLA accuracy was predicted by  $\alpha_{secondary}$  though this model only  
346 approached significance ( $R = 0.121$ ,  $F(1,29) = 3.981$ ,  $p = 0.055$ ). Under HAL however, accuracy was

347 predicted by a model with  $\alpha_{\text{secondary}}$  and  $\alpha_{\text{primary}}$  ( $R = 0.450$ ,  $F(2,28) = 3.560$ ,  $p = 0.042$ ), with  $\alpha_{\text{primary}}$  a  
348 significant positive predictor of accuracy ( $\beta = 0.404$ ,  $p = 0.028$ ). Removing  $\alpha_{\text{secondary}}$  as a predictor did  
349 not significantly improve the fit of this model ( $R^2\text{change} = 0.014$ ,  $F\text{change}(1,29) = 0.495$ ,  $p = 1.000$ ).  
350 When combined with our optimality analysis, these results suggest that under placebo  $\alpha_{\text{primary}}$  was  
351 outside of the optimal range of  $\alpha$  values and thus accuracy was primarily driven by  $\alpha_{\text{secondary}}$ .  
352 However, haloperidol reduced  $\alpha_{\text{primary}}$ , bringing it within the optimal range. Thus, under haloperidol  
353 accuracy was driven by both  $\alpha_{\text{primary}}$  and  $\alpha_{\text{secondary}}$ .

354

355 In sum, relative to placebo, the dopamine D2 receptor antagonist haloperidol significantly decreased  
356 learning rates relating to learning from primary, but not secondary sources of information, likely via  
357 mediation of phasic dopaminergic signalling (see Appendix 4iv). Interestingly, learning rates for  
358 learning from the primary source were higher than optimal under placebo and haloperidol brought  
359 them within the optimal range. Consequently, both primary and secondary learning contributed to  
360 accuracy under haloperidol but not under placebo. Importantly, the effects of haloperidol did not  
361 vary as a function of group allocation which dictated whether the primary source was of social or  
362 individual nature. A Bayesian analysis confirmed that we had moderate evidence to support the  
363 conclusion that there was no interaction between drug, learning source and group. These data, thus,  
364 illustrate a dissociation along the primary-secondary but not social-individual axis.

365

## 366 **Discussion**

367

368 The current study tested the hypothesis that social and individual learning share common  
369 neurochemical mechanisms when they are matched in terms of (primary versus secondary) status.  
370 Specifically, we predicted that haloperidol would perturb learning from the primary but not the  
371 secondary source, irrespective of social or individual nature. Supporting our hypothesis, we observed  
372 an interaction between drug and information source (social versus individual) such that under  
373 haloperidol (compared to placebo) participants exhibited reduced learning rates with respect to  
374 learning from the primary, but not the secondary, source of information. Crucially, we did not  
375 observe an interaction between drug, information source and group (social-primary versus  
376 individual-primary). Bayesian statistics revealed that, given the observed data, a model that excludes  
377 this interaction is 7.5 times more likely than models which include the interaction.

378

379 An important question concerns whether the lack of a dopaminergic dissociation between social and  
380 individual learning could be explained by participants not fully appreciating the social nature of the



381 red shape (the social information source). In opposition to this, we argue that since our participants  
382 could not commence the task until reaching 100% accuracy in a pre-task quiz, which questioned  
383 participants about the social nature of the red shape, we can be confident that all participants knew  
384 that the red shape indicated information from previous participants. Participants also completed a  
385 post-task questionnaire (Appendix 5), which required them to reflect upon the extent to which their  
386 decisions were influenced by the social (red shape) and individual (blue/green shapes) information.  
387 The individual-primary and social-primary groups did not differ in their beliefs about the extent to  
388 which they were influenced by these two sources of information. Furthermore, in our previous work,  
389 using the same social manipulation, we demonstrated that the personality trait social dominance  
390 significantly predicts social, but not individual, learning (Cook et al., 2014). Thus, illustrating that  
391 participants treat the social information differently from the non-social information in this type of  
392 paradigm. Finally, based on previous studies, we argue that even with a more overtly social  
393 manipulation it is highly likely that social learning would still be perturbed by dopaminergic  
394 modulation when social information is the primary source. Indeed, in a study by Diaconescu et  
395 al.(2017) social information was represented by a video of a person indicating one of the two  
396 options. Even with this overtly social stimulus, Diaconescu et al. still observed that social learning  
397 covaried with genetic polymorphisms that affect the functioning of the dopamine system.

398  
399 Our results comprise an important contribution to the debate concerning the existence of social-  
400 specific learning mechanisms. We find that, like individual learning, social learning is modulated by a  
401 dopaminergic manipulation when it is the primary source of information. This result marries well  
402 with previous studies that have linked social learning with dopamine-rich mechanisms when the  
403 social source has been the primary (or in many cases the sole) information source (Campbell-  
404 Meiklejohn et al., 2017; Diaconescu et al., 2017; Klucharev et al., 2009). Our results are also  
405 consistent with studies that have associated social learning with different neural correlates, outside  
406 of the dopamine-rich regions classically linked to individual learning, when it is a *secondary* source of  
407 information (Behrens et al., 2008; Hill et al., 2016; Zhang & Gläscher, 2020). Our data suggest that  
408 social and individual learning share common dopaminergic mechanisms when they are the primary  
409 learning source and that previous dissociations between these two learning types may be more  
410 appropriately thought of as dissociations between learning from a primary and secondary source.  
411 Extant studies (e.g. Cook et al., 2019) were not able to illustrate the importance of the primary  
412 versus secondary distinction because they did not fully orthogonalize primary versus secondary and  
413 social versus individual learning.

414

415 Though our results suggest shared neurochemical mechanisms for social and individual learning  
416 when they are matched in status, it is, nevertheless, essential to highlight that it does not follow that  
417 there are *no* dimensions along which social learning may be dissociated from individual learning. For  
418 instance, it is possible that although social and individual learning are affected by dopaminergic  
419 modulation - when they are the primary source - there are differences in the *location* of neural  
420 activity that could be revealed by neuroimaging. For instance, although social and individual learning  
421 are both associated with activity within the striatum (Burke et al., 2010; Cooper et al., 2012), social-  
422 specific activation patterns have been observed in other brain regions, including the temporoparietal  
423 junction (Behrens et al., 2008; Lindström et al., 2018) and the gyrus of the anterior cingulate cortex  
424 (Behrens et al., 2008; Hill et al., 2016; Zhang & Gläscher, 2020). Such a location-based dissociation  
425 requires further empirical investigation as well as further consideration of the possible functional  
426 significance of such location-based differences, if they are indeed present when primary versus  
427 secondary status is accounted for. Additionally, since we did not observe significant effects of  
428 haloperidol on learning from social or individual sources when they were secondary in status, it  
429 remains a logical possibility that social and individual learning can be neurochemically dissociated  
430 when they are the secondary source of information - though it is admittedly difficult to conceive of a  
431 parsimonious explanation for the existence of two neurochemical mechanisms for social and  
432 individual learning *from secondary sources*. Finally, it is possible that social and individual learning  
433 share common *dopaminergic* mechanisms when they are the primary source, but differentially  
434 recruit other neurochemical systems. For instance, some have argued that social learning may  
435 heavily rely upon serotonergic mechanisms (Crişan et al., 2009; Frey & McCabe, 2020; Roberts et al.,  
436 2020). The abovementioned avenues should be further explored however, in the interim, it must be  
437 concluded that since existing studies have not controlled for primary versus secondary status, we do  
438 not currently have convincing evidence that social and individual learning can be dissociated in the  
439 human brain.

440

441 Notably, our results reveal a clear dissociation between learning from primary and secondary  
442 sources. The effects of haloperidol on learning from the primary source are consistent with previous  
443 work. Non-human animal studies, have shown that phasic signalling of dopaminergic neurons in the  
444 mesolimbic pathway encodes reward prediction error signals (Schultz, 2007; Schultz et al., 1997).  
445 Since haloperidol has high affinity for D2 receptors (Grace, 2002), which are densely distributed in  
446 the mesolimbic pathway (Camps et al., 1989; Lidow et al., 1991), dopamine antagonists including  
447 haloperidol can affect phasic dopamine signals (Frank and O'Reilly, 2006) - either via binding at  
448 postsynaptic D2 receptors (which blocks the effects of phasic dopamine bursts), or via pre-synaptic

449 autoreceptors (which has downstream effects on the release and reuptake of dopamine and thus  
450 modulates bursting itself) (Benoit-Marand et al., 2001; Ford, 2014; Schmitz et al., 2003). Indeed a  
451 number of studies have shown that haloperidol can attenuate prediction error-related signals  
452 (Diederer et al., 2017; Haarsma et al., 2018; Menon et al., 2007; Pessiglione et al., 2006). In line with  
453 this, we observed that learning rates were lower under haloperidol. However, in our paradigm  
454 learning rates for learning from the primary source were *higher than optimal under placebo*, thus  
455 haloperidol had the beneficial effect of bringing learning rates closer to optimal. In sum, our results  
456 are in accordance with previous work demonstrating the importance of phasic dopamine D2-related  
457 signalling in learning from primary sources.

458

459 Perhaps the most novel contribution of our work is that we here illustrate that, whilst dopaminergic  
460 modulation affects learning from the primary source, it does not significantly affect learning from  
461 the secondary source. Previous studies have illustrated that humans can learn - ostensibly  
462 simultaneously - from multiple sources of information and tend to organise this information in a  
463 hierarchical fashion such that the source which is currently of highest value has the greatest  
464 influence on a learner's behaviour (Daw et al., 2006). Here we extend this work by showing that the  
465 primary source, at the top of the hierarchy, is more heavily influenced by modulation of the  
466 dopamine system, thus suggesting a graded involvement of the dopamine system according to a  
467 source's status in the "learning hierarchy". Extant studies (Daw et al., 2006) suggest that such  
468 learning hierarchies are flexible and can be rapidly remodelled according to a source's current value.  
469 The success of our orthogonalization of social versus individual and primary versus secondary  
470 learning depended on a within-subjects design, wherein the status (primary or secondary) of the  
471 learning source varied only between participants. Although our study was therefore not optimised  
472 for studying the rapid remodelling of learning hierarchies, our results pave the way for future studies  
473 to investigate whether the impact of dopaminergic modulation of learning from a particular source  
474 quickly changes according to the source's current status in the learning hierarchy.

475

476 In sum, in previous paradigms that dissociate social and individual learning, the social information  
477 comprised a secondary or additional information source, differing from individual information both  
478 in terms of its social nature (social/individual) and status (secondary/primary). We here provide  
479 evidence that dissociable effects of dopaminergic manipulation on different learning types are  
480 better explained by primary versus secondary status, than by social versus individual nature.

481 Specifically, we showed that, relative to placebo, haloperidol reduced learning rates relating to  
482 learning from the primary, but not secondary, source of information irrespective of social versus

483 individual nature. Results illustrate that social and individual learning share a common dependence  
484 on dopaminergic mechanisms when they are the primary learning source.

485 **Table 1**

486 *Participant information*

|                                   | Individual-primary<br>group<br>(n = 15) | Social-primary<br>group<br>(n = 16) | t (1,29) | $\chi^2$ (1, N = 31) | p     |
|-----------------------------------|-----------------------------------------|-------------------------------------|----------|----------------------|-------|
|                                   | Mean (SD)                               | Mean (SD)                           |          |                      |       |
| Gender<br>(n males: n<br>females) | 7:8                                     | 8:8                                 |          | 0.034                | 0.853 |
| Age                               | 25.600 (5.448)                          | 25.625 (4.745)                      | 0.014    |                      | 0.989 |
| VWM                               | 80.333 (6.016)                          | 76.354 (7.823)                      | 1.580    |                      | 0.125 |
| BMI                               | 24.016 (2.807)                          | 22.625 (2.606)                      | 1.431    |                      | 0.114 |

487 *Note:* SD refers to standard deviation, VWM refers to verbal working memory span, BMI refers to  
 488 body mass index. Age, gender, BMI and VWM did not significantly differ between the groups.

## 489 **Materials and Methods**

490

### 491 **Subjects**

492 Subjects (n = 43, aged 19 to 42 years, mean (SD) = 26 (6.3); 19 female) were recruited from the  
493 University of Birmingham and surrounding areas in Birmingham city, via posters, email lists and  
494 social media. Four participants dropped out of the study after completing the first day. A further five  
495 participants could not complete the second test day, due to university-wide closures and a  
496 restriction of data collection. In total, 43 participants completed one session, with 33 participants  
497 completing both test days. However, Bayes exclusion factors were reported for interactions of  
498 interest, to avoid the possibility of type 2 error. The study was in line with the local ethical guidelines  
499 approved by the local ethics committee (ERN\_18\_1588) and in accordance with the Helsinki  
500 Declaration of 1975.

501

### 502 **General procedure**

503 The study protocol was pre-registered (see Open Science Framework (OSF) <https://osf.io/drmjb> for  
504 study design and *a priori* sample size calculations). All participants attended a preliminary health  
505 screening session with a qualified clinician, followed by two test sessions with an interval of one to a  
506 maximum of four weeks between testing session. The health screening session, lasting  
507 approximately one hour, started with informed consent, followed by a medical screening.  
508 Participants were excluded from further participation if they met any of the exclusion criteria.  
509 Participants then completed a battery of validated questionnaire measures (see Appendix 1 for  
510 inclusion/exclusion criteria, questionnaire measures, medical symptoms, and mood ratings). Both  
511 test days (1-4 weeks post health screening) followed the same procedure, starting with informed  
512 consent, followed by a medical screening. Participants were then administered capsules (by a  
513 member of staff not involved in data collection) containing either 2.5 mg haloperidol (HAL) or  
514 placebo (PLA), in a double-blind, placebo-controlled, cross-over design. Participants were told to  
515 abstain from alcohol and recreational drugs in the 24 hours prior to testing and from eating in the  
516 two hours prior to capsule intake.

517

518 1.5 hours after capsule intake, participants commenced a battery of behavioural tasks, including a  
519 probabilistic learning paradigm (Go-NoGo learning (Frank & O'Reilly, 2006)) and a measure of verbal  
520 working memory (Sternberg, 1969). The social learning task was started approximately 3 hours post-  
521 capsule administration, within the peak of HAL blood plasma concentration. HAL dosage and  
522 administration times were in line with similar studies which demonstrated both behavioural and

523 psychological effects of haloperidol (Bestmann et al., 2014; Frank & O'Reilly, 2006). Both test days  
524 lasted approximately 5.5 hours in total, with participants starting at the same time of day for both  
525 sessions. Blood pressure, mood and medical symptoms were monitored throughout each day:  
526 before capsule intake, three times during the task battery and after finishing the task battery. On  
527 completion of the second session, participants reported on which day they thought they had taken  
528 the active drug or placebo. Participants received monetary compensation on completion of both  
529 testing sessions, at a rate of £10 per hour, with the opportunity to add an additional £5 based on  
530 their performance during the learning task.

531

### 532 ***Behavioural task***

533 Participants completed a modified version of a social learning task (Cook et al., 2014), first  
534 developed by Behrens and colleagues (Behrens et al., 2008). The task was programmed using  
535 MATLAB R2017b (The MathWorks, Natick, MA). Participants were randomly allocated to one of two  
536 groups. For both groups, participants completed 120 trials on both test days. The task lasted  
537 approximately 35 minutes, including instructions. Before the main task, participants completed a  
538 step-by-step on-screen practice task (10 trials) in which they learnt to choose between the two  
539 options to obtain a reward and learned that the "advice" represented by the frame(s) could help in  
540 making the correct choice in some phases. In our previous work with the individual-primary  
541 condition alone, we demonstrated that social dominance significantly predicts social, but not  
542 individual, learning (Cook et al., 2014). Thus, showing that participants maintain a conceptual  
543 distinction between the social and individual learning sources. In the current study we investigated  
544 whether participants, maintained this conceptual distinction by requiring participants to complete a  
545 short quiz (3 questions), testing their knowledge, after the practice task. Participants were required  
546 to repeat the practice round until they achieved 100% correct score in the quiz, meaning that all  
547 participants understood the structure of the task, and that the red shape represented *social*  
548 information. Furthermore, after the experiment, participants completed a feedback questionnaire  
549 (Appendix 5). Answers confirmed that participants understood the difference between, and paid  
550 attention to both, individual and social sources of information. Participants were informed as to  
551 whether they had earned a £5 bonus after the second session. Due to ethical considerations, all  
552 participants received the bonus.

553

### 554 ***Individual-primary group***

555 On each trial participants were required to choose between a blue or green box to gain points.  
556 Participants could also use an additional, secondary, source of information - a red frame surrounding

557 either the blue or green box – to help make their decision. Participants were informed (see Appendix  
558 5 for instruction scripts) that the frame represented the most popular choice made by a group of  
559 participants who had previously completed the task. They were also informed that the task followed  
560 ‘phases’ wherein sometimes the blue, but at other times the green choice, was more likely to result  
561 in reward and sometimes the social information predominantly indicated the correct box, but at  
562 other times it predominantly surrounded the incorrect box (Fig.1A). After making their choice  
563 participants received outcome information in the form of a blue or green indicator. The indicator  
564 primarily informed participants about whether the blue or green box had been rewarded on the  
565 current trial. Whether the social information surrounded the correct or incorrect box could,  
566 secondarily, be inferred from the indicator. For example, if the red frame indicated that the social  
567 group had chosen the blue shape, and the blue shape was shown to be correct, participants could  
568 infer that the social information had therefore been correct on that trial. Both the probability of  
569 reward associated with the blue/green stimuli and the utility of the social information, varied  
570 according to separate probabilistic schedules, with participants randomly assigned to one of four  
571 groups (Appendix 2). For both individual and social information, the probabilistic schedules featured  
572 stable phases, where the probability of reward was constant, and volatile phases, in which the  
573 probability switched every 10-20 trials. This feature of the task design was included to capture  
574 potential effects of dopaminergic modulation on adaptation to environmental volatility (Cook et al.,  
575 2019). Participants were informed that correct choices would be rewarded, and thus to aim to  
576 accumulate points to obtain a reward at the end of the experiment. Although probabilistic schedules  
577 for Day 2 were the same as Day 1, there was variation in the trial-by-trial outcomes and advice. In  
578 addition, to prevent participants from transferring learned stimulus-reward associations from Day 1  
579 to Day 2, different coloured stimuli were employed on the second session: participants viewed  
580 blue/green squares with advice represented as a red frame on Day 1 and yellow/purple squares with  
581 advice represented as a blue frame on Day 2.

582

### 583 *Social-primary group*

584 For the social-primary group the social information source was the primary source of learning. On  
585 each trial participants were presented with two grey placeholders. One placeholder was filled with a  
586 red box, indicating the group’s choice. Blue/green frames then appeared around the placeholders.  
587 As in the individual-primary group, participants were informed that the task followed ‘phases’  
588 wherein sometimes going with, but at other times going against, the group’s choice was more likely  
589 to result in reward and sometimes the blue frame predominantly indicated the correct box, whereas  
590 at other times the green frame predominantly indicated the correct box. After making their choice



591 participants received outcome information in the form of a tick/cross indicator. The indicator  
592 primarily informed participants about whether the social group had been rewarded (and thus going  
593 with them would have resulted in points scoring but going against them would not) on the current  
594 trial. Whether the blue(green) frame surrounded the correct or incorrect option could, secondarily,  
595 be inferred from the indicator. As in the individual-primary task, both the probability of reward  
596 associated with the blue/green stimuli and the utility of the social information varied according to  
597 probabilistic schedules (Appendix 2). All other aspects of the task structure were the same as  
598 previously described in the individual-primary task group.

599

### 600 ***Data analysis***

601 All analyses were conducted using MATLAB R2017b (The MathWorks, Natick, MA) and Bayesian  
602 analyses using JASP (JASP Team (2020). JASP (Version 0.14) [Computer software]). Linear mixed  
603 models were fitted to data using RStudio (RStudio Team (2020). RStudio: Integrated Development  
604 for R. RStudio, PBC, Boston, MA). In the instance of data not meeting assumptions of normality (as  
605 assessed by Kolmogorov–Smirnov testing), data were square-root-transformed. Learning rate  $\alpha$   
606 values were square-root transformed. We used the standard  $p < .05$  criteria for determining if  
607 significant effects were observed, with a Holm correction applied for unplanned multiple  
608 comparisons, to control for type I family-wise errors. In addition, effect sizes and beta weights for  
609 linear mixed model analysis are reported.

610

### 611 ***Data pre-processing***

612 Datasets were excluded based on the following: accuracy  $< 50\%$  under placebo, chose the same side  
613 (left/right) or colour on  $> 80\%$  trials, incomplete datasets (less than 120 trials completed). Two  
614 subjects were excluded, resulted in a final sample of  $n = 31$ , with behavioural data for both testing  
615 days, and  $n = 41$ , with data for one day only (see Appendix 4i for analysis).

616

### 617 ***Computational modelling framework***

618 Participant responses were modelled using an adapted Rescorla-Wagner learning model (Rescorla &  
619 Wagner, 1972). The model relies on the assumption that updates to choice behaviour are based on  
620 prediction errors, i.e., the difference between an expected and the actual outcome. Participants  
621 were assumed to update their beliefs about outcomes based on sensory feedback (perceptual  
622 model), and to use this feedback to make decisions about the next action (response model). Model  
623 fitting was performed using scripts adapted from the TAPAS toolbox (Diaconescu et al., 2014)  
624 (scripts available at OSF link <https://tinyurl.com/b3c7d2zb>). A systematic comparison of eight

625 separate models (Appendix 3 for full details regarding model fitting and model comparison) showed  
626 that the exceedance probability of this particular model was  $\sim 1$ . This demonstrates (relative)  
627 evidence in favour of the conclusion that, the current model, with separate learning rates for  
628 primary and secondary information, and volatile and stable phases, provided the best fit to  
629 participant choice data and that the data likely originated from the same model for both HAL and  
630 PLA treatment conditions (Supplemental Fig 2). Further model validation, including simulation of  
631 data and parameter recovery, provided further support for the choice of computational model  
632 (Appendix 3).

633

### 634 *Perceptual model*

635 The Rescorla-Wagner predictors used in our learning models consisted of a modified version of a  
636 simple learning model, with one free parameter, the learning rate  $\alpha$ , varying between 0 and 1.

637

$$638 \quad V_{(i+1)} = V_i + \alpha(r_i - V_i)$$

639

640 According to this model the predicted value ( $V_i$ ) is updated on each trial based on the prediction  
641 error (PE), or the difference between the actual and the expected reward ( $r_i - V_i$ ), weighted by the  
642 learning rate  $\alpha$ .  $\alpha$  thus captures the extent to which the PE updates the estimated value on the next  
643 trial. In line with previous work (Cook et al., 2019), we used an extended version of this learning  
644 model, with separate  $\alpha$  values for volatile and stable environmental phases. In a stable environment,  
645 learning rate will optimally be low, and reward outcomes over many trials will be taken into account.  
646 In a volatile environment, however, an increased learning rate is optimal, as more recent trials are  
647 used to update choice behaviour (Behrens et al., 2007). Furthermore, we simultaneously ran two  
648 Rescorla-Wagner predictors in order to estimate parameters relating to learning from primary and  
649 secondary information sources. Consequently, our model generated the predicted value of going  
650 with the primary source (going with the blue frame for the individual-primary group, going with the  
651 group for the social-primary group;  $V_{\_primary(i+1)}$ ) and the predicted value of the secondary  
652 information (going with the group recommendation for the individual-primary group, going with the  
653 blue frame for the social-primary group;  $V_{\_secondary(i+1)}$ ) and provided four  $\alpha$  estimates:  $\alpha_{primary\_stable}$ ,  
654  $\alpha_{primary\_volatile}$ ,  $\alpha_{secondary\_stable}$ ,  $\alpha_{secondary\_volatile}$ .

655

### 656 *Response model*

657 Our response model assumed that participants integrated learning from both primary and secondary  
658 sources. The action selector predicts the probability that the primary information (blue choice/

659 group choice) will be rewarded on a given trial and was based on the softmax function (TAPAS  
660 toolbox), adapted by Diaconescu and colleagues (Diaconescu et al., 2014). This response model is  
661 adapted from that used by Cook and colleagues (Cook et al., 2019) and reproduced here with  
662 permission. The value of primary and secondary information was combined using the following:

663

$$664 \quad V_{\text{primary}(i+1)} = \zeta(V_{\text{secondary\_advice\_weighted}(i+1)}) + (1 - \zeta)(V_{\text{primary}(i+1)})$$

665

666 wherein  $\zeta$  is a parameter that varies between individuals, and which controls the weighting of  
667 secondary relative to primary sources of information.  $V_{\text{secondary\_advice\_weighted}(i+1)}$  comprises the advice  
668 provided by the secondary information (the red and blue frames, for individual-primary and social-  
669 primary groups respectively) weighted by the probability of advice accuracy ( $V_{\text{secondary}(i+1)}$ ) in the  
670 context of making a choice to go with the primary information (the blue and red box for the  
671 individual-primary and social-primary groups respectively). That is:

672

$$673 \quad V_{\text{secondary\_advice\_weighted}(i+1)} = |\text{advice} - V_{\text{secondary}(i+1)}|$$

674

675 where advice from the red frame equals 0 for blue and 1 for green, and advice from the blue frame  
676 equals 0 for going with the red box and 1 for going against the red box. For example, for a  
677 participant in the social-primary group, if the blue frame advised them to go with the red box (the  
678 group choice) and the probability of advice accuracy was estimated at 80% ( $V_{\text{secondary}(i+1)} = 0.80$ ), the  
679 probability that the choice to go with the group will be rewarded, inferred from secondary learning,  
680 would be 0.8 ( $V_{\text{secondary\_advice\_weighted}(i+1)} = |0-0.8| = 0.8$ ). The probability that this integrated belief  
681 would determine participant choice was described by a unit square sigmoid function, describing how  
682 learned belief values are translated into choices.

683

$$684 \quad P(y_{(i+1)} = 1 || V_{\text{primary}(i+1)}) = \frac{V_{\text{primary}(i+1)}^\beta}{V_{\text{primary}(i+1)}^\beta + (1 - V_{\text{primary}(i+1)})^\beta}$$

685

686 Here, responses are coded as  $y_{(i+1)} = 1$  when selecting the primary option (going with the blue and red  
687 box for the individual-primary and social-primary groups respectively), and  $y_{(i+1)} = 0$  when selecting  
688 the alternative (going with the green box and going against the red box for the individual-primary  
689 and social-primary groups respectively). The participant-specific free parameter  $\beta$ , the inverse of the  
690 decision temperature, describes the extent to which estimated value of choices determines actual  
691 participant choice: as  $\beta$  decreases, decision noise increases and decisions become more stochastic;  
692 as  $\beta$  increases, decisions become more deterministic towards the higher value option.

693 *Significance tests for estimated model parameters*

694 Parameters were fitted separately for each participant's choice data. Learning rate ( $\alpha$ ) was  
695 estimated for each participant, for primary and secondary learning, for volatile and stable phases, on  
696 both test days, resulting in 8 estimated learning rates per participant.  $\beta$  values were also estimated  
697 for each participant on both treatment days, resulting in two  $\beta$  values per participant. Effects-coded  
698 mixed model linear analyses were carried out, to allow for inclusion of subject as a random factor  
699 thus ensuring that between-participant variation in  $\alpha$  could be controlled for. Fixed factors were  
700 drug (HAL, PLA), information type (primary, secondary), volatility (volatile, stable) and group  
701 (individual primary, social-primary), with the inclusion of random intercepts for participant:  $\sim$  group  
702 x information x drug x volatility + 1 | subject.

703

704 Repeated-measures analysis of variance (RM-ANOVA) for linear mixed effects models was carried  
705 out using the Satterthwaite approximation for degrees of freedom, and the model was fit using  
706 maximum likelihood estimation, with a model including random intercepts, but not random slopes,  
707 providing the best fit to the data. All analyses were repeated with and without the inclusion of age,  
708 BMI and baseline working memory as covariates, with the pattern of results unchanged. Where  
709 appropriate, data were transformed to meet assumptions of normality for parametric testing.

710

711 ***Bayesian statistical testing***

712 Bayesian statistical testing was implemented as a supplement to null hypothesis significance tests, to  
713 investigate if null results represent a true lack of a difference between the groups (Dienes, 2014),  
714 using JASP software, based on the R package "BayesFactor" (Rouder et al., 2012). The JASP  
715 framework for repeated measures ANOVA was used (Van Den Bergh et al., 2020), whereby exclusion  
716 Bayes factors were obtained for predictors of interest. The exclusion Bayes factor ( $BF_{\text{excl}}$ ) for a given  
717 predictor or interaction quantifies the change in odds from the prior probability that the predictor is  
718 included in the regression model, to the probability of exclusion in the model after seeing the data  
719 ( $BF_{\text{excl}}$ ). Bayes factors were computed by comparing all models with a predictor against all models  
720 without that predictor, i.e., comparing models that contain the effect of interest to equivalent  
721 models stripped of the effect. For example, an exclusion Bayes factor for an effect of 3 for a given  
722 predictor  $i$  can be interpreted as stating that, models which exclude the predictor  $i$ , are 3 times more  
723 likely to describe the observed data than models which include the predictor. In short, the exclusion  
724 Bayes factor is interpreted as the evidence given the observed data for excluding a certain predictor  
725 in the model and can be used as evidence to support null results. For all Bayesian analyses, the Bayes  
726 factor quantifies the relative evidence for one theory or model over another. We followed the

727 classification scheme used in JASP (Lee & Wagenmakers, 2013) to classify the strength of evidence  
728 given by the Bayes factors, with  $BF_{\text{excl}}$  between one and three considered as weak evidence, between  
729 three and ten as moderate evidence and greater than ten as strong evidence for the alternative  
730 hypothesis respectively.

731

732

### 733 **Acknowledgements**

734

735 We would like to acknowledge Ms Lydia Hickman for assistance with data collection and Dr Kasim  
736 Qureshi and Dr Hannah Liu for medical screening. Ms Rybicki's role in this project is supported by a  
737 Midlands Integrative Biosciences Training Partnership (MIBTP) - Biotechnology and Biological  
738 Sciences Research Council (BBSRC) PhD studentship. Dr Cook, Dr Sowden and Ms Schuster were  
739 supported by the European Union's Horizon 2020 Research and Innovation Programme under  
740 European Research Council (ERC)-2017-STG Grant Agreement No 757583 (Brain2Bee).

741

### 742 **Authors' contributions**

743 A.R made substantial contributions to the design of the study, collected and reviewed the papers,  
744 conducted the experiment, wrote the manuscript, and approved the final draft. S.S and B.S  
745 contributed to data collection. J.C contributed to the conception and design of the study, wrote the  
746 manuscript, provided a critical review of the manuscript, and approved the final draft. All authors  
747 edited the final draft.

748

### 749 **Competing interests**

750

751 The authors declare no competing interests.

752

## References

- Apps, M. A. J., Rushworth, M. F. S., & Chang, S. W. C. (2016). The anterior cingulate gyrus and social cognition: tracking the motivation of others. *Neuron*, *90*(4), 692–707.  
<https://doi.org/10.1016/j.neuron.2016.04.018>
- Balsters, J. H., Apps, M. A. J., Bolis, D., Lehner, R., Gallagher, L., & Wenderoth, N. (2017). Disrupted prediction errors index social deficits in autism spectrum disorder. *Brain*, *140*(1), 235–246.  
<https://doi.org/10.1093/brain/aww287>
- Behrens, T. E. J., Hunt, L. T., & Rushworth, M. F. S. (2009). The computation of social behavior. *Science*, *324*(5931), 1160–1164. <https://doi.org/10.1126/science.1169694>
- Behrens, T. E. J., Hunt, L. T., Woolrich, M. W., & Rushworth, M. F. S. (2008). Associative learning of social value. *Nature*, *456*(7219), 245–249. <https://doi.org/10.1038/nature07538>
- Behrens, T. E. J., Woolrich, M. W., Walton, M. E., & Rushworth, M. F. S. (2007). Learning the value of information in an uncertain world. *Nature Neuroscience*, *10*(9), 1214–1221.  
<https://doi.org/10.1038/nn1954>
- Benoit-Marand, M., Borrelli, E., & Gonon, F. (2001). Inhibition of dopamine release via presynaptic D2 receptors: Time course and functional characteristics in vivo. *Journal of Neuroscience*, *21*(23), 9134–9141. <https://doi.org/10.1523/jneurosci.21-23-09134.2001>
- Bestmann, S., Ruge, D., Rothwell, J., & Galea, J. M. (2014). The role of dopamine in motor flexibility. *Journal of Cognitive Neuroscience*, *27*(2), 365–376. [https://doi.org/10.1162/jocn\\_a\\_00706](https://doi.org/10.1162/jocn_a_00706)
- Biele, G., Rieskamp, J., & Gonzalez, R. (2009). Computational models for the combination of advice and individual learning. *Cognitive Science*, *33*(2), 206–242. <https://doi.org/10.1111/j.1551-6709.2009.01010.x>
- Biele, G., Rieskamp, J., Krugel, L. K., & Heekeren, H. R. (2011). The neural basis of following advice. *PLoS Biology*, *9*(6). <https://doi.org/10.1371/journal.pbio.1001089>
- Braams, B. R., Güroğlu, B., De Water, E., Meuwese, R., Koolschijn, P. C., Peper, J. S., & Crone, E. A. (2014). Reward-related neural responses are dependent on the beneficiary. *Social Cognitive and Affective Neuroscience*, *9*(7), 1030–1037. <https://doi.org/10.1093/scan/nst077>
- Brazil, I. A., Hunt, L. T., Bulten, B. H., Kessels, R. P. C., de Bruijn, E. R. A., & Mars, R. B. (2013). Psychopathy-related traits and the use of reward and social information: A computational approach. *Frontiers in Psychology*, *4*(DEC), 1–11. <https://doi.org/10.3389/fpsyg.2013.00952>
- Bromberg-Martin, E. S., Matsumoto, M., Hong, S., & Hikosaka, O. (2010). A pallidum-habenula-dopamine pathway signals inferred stimulus values. *Journal of Neurophysiology*, *104*(2), 1068–1076. <https://doi.org/10.1152/jn.00158.2010>

- Burke, C. J., Tobler, P. N., Baddeley, M., & Schultz, W. (2010). Neural mechanisms of observational learning. *Proceedings of the National Academy of Sciences of the United States of America*, *107*(32), 14431–14436. <https://doi.org/10.1073/pnas.1003111107>
- Campbell-Meiklejohn, D. K., Bach, D. R., Roepstorff, A., Dolan, R. J., & Frith, C. D. (2010). How the opinion of others affects our valuation of objects. *Current Biology*, *20*(13), 1165–1170. <https://doi.org/10.1016/j.cub.2010.04.055>
- Campbell-Meiklejohn, D. K., Simonsen, A., Frith, C. D., & Daw, N. D. (2017). Independent neural computation of value from other people's confidence. *Journal of Neuroscience*, *37*(3), 673–684. <https://doi.org/10.1523/JNEUROSCI.4490-15.2016>
- Camps, M., Cortés, R., Gueye, B., Probst, A., & Palacios, J. M. (1989). Dopamine receptors in human brain: Autoradiographic distribution of D2 sites. *Neuroscience*, *28*(2), 275–290. [https://doi.org/10.1016/0306-4522\(89\)90179-6](https://doi.org/10.1016/0306-4522(89)90179-6)
- Cook, J. L. (2014). Task-relevance dependent gradients in medial prefrontal and temporoparietal cortices suggest solutions to paradoxes concerning self/other control. *Neuroscience and Biobehavioral Reviews*, *42*, 298–302. <https://doi.org/10.1016/j.neubiorev.2014.02.007>
- Cook, J. L., Den Ouden, H. E. M., Heyes, C. M., & Cools, R. (2014). The social dominance paradox. *Current Biology*, *24*(23), 2812–2816. <https://doi.org/10.1016/j.cub.2014.10.014>
- Cook, J. L., Swart, J. C., Froböse, M. I., Diaconescu, A. O., Geurts, D. E. M., Den Ouden, H. E. M., & Cools, R. (2019). Catecholaminergic modulation of meta-learning. *eLife*, *8*, 1–38. <https://doi.org/10.7554/eLife.51439>
- Cooper, J. C., Dunne, S., Furey, T., & O'Doherty, J. P. (2012). Human dorsal striatum encodes prediction errors during observational learning of instrumental actions. *Journal of Cognitive Neuroscience*, *24*(1), 106–118. [https://doi.org/10.1162/jocn\\_a\\_00114](https://doi.org/10.1162/jocn_a_00114)
- Crişan, L. G., Pană, S., Vultur, R., Heilman, R. M., Szekely, R., Drugă, B., Dragoş, N., & Miu, A. C. (2009). Genetic contributions of the serotonin transporter to social learning of fear and economic decision making. *Social Cognitive and Affective Neuroscience*, *4*(4), 399–408. <https://doi.org/10.1093/scan/nsp019>
- Daw, N. D., Niv, Y., & Dayan, P. (2005). Uncertainty-based competition between prefrontal and dorsolateral striatal systems for behavioral control. *Nature Neuroscience*, *8*(12), 1704–1711. <https://doi.org/10.1038/nn1560>
- Daw, N. D., O'Doherty, J. P., Dayan, P., Seymour, B., & Dolan, R. J. (2006). Cortical substrates for exploratory decisions in humans. *Nature*, *441*(7095), 876–879. <https://doi.org/10.1038/nature04766>
- Delgado, M. R., Frank, R. H., & Phelps, E. A. (2005). Perceptions of moral character modulate the

- neural systems of reward during the trust game. *Nature Neuroscience*, *8*(11), 1611–1618.  
<https://doi.org/10.1038/nn1575>
- Diaconescu, A. O., Mathys, C., Weber, L. A. E., Daunizeau, J., Kasper, L., Lomakina, E. I., Fehr, E., & Stephan, K. E. (2014). Inferring on the intentions of others by hierarchical Bayesian learning. *PLoS Computational Biology*, *10*(9), e1003810. <https://doi.org/10.1371/journal.pcbi.1003810>
- Diaconescu, A. O., Mathys, C., Weber, L. A. E., Kasper, L., Mauer, J., & Stephan, K. E. (2017). Hierarchical prediction errors in midbrain and septum during social learning. *Social Cognitive and Affective Neuroscience*, *12*(4), 618–634. <https://doi.org/10.1093/scan/nsw171>
- Diederer, K. M. J., Ziauddeen, H., Vestergaard, M. D., Spencer, T., Schultz, W., & Fletcher, P. C. (2017). Dopamine modulates adaptive prediction error coding in the human midbrain and striatum. *Journal of Neuroscience*, *37*(7), 1708–1720.  
<https://doi.org/10.1523/JNEUROSCI.1979-16.2016>
- Dienes, Z. (2014). Using Bayes to get the most out of non-significant results. *Frontiers in Psychology*, *5*(July), 1–17. <https://doi.org/10.3389/fpsyg.2014.00781>
- Dolan, R. J., & Dayan, P. (2013). Goals and habits in the brain. *Neuron*, *80*(2), 312–325.  
<https://doi.org/10.1016/j.neuron.2013.09.007>
- Ereira, S., Hauser, T. U., Moran, R., Story, G. W., Dolan, R. J., & Kurth-Nelson, Z. (2020). Social training reconfigures prediction errors to shape Self-Other boundaries. *Nature Communications*, *11*(1), 1–14. <https://doi.org/10.1038/s41467-020-16856-8>
- Ford, C. P. (2014). The role of D2-autoreceptors in regulating dopamine neuron activity and transmission. *Neuroscience*, *282*, 13–22.  
<https://doi.org/10.1016/j.neuroscience.2014.01.025>
- Frank, M. J., & O'Reilly, R. C. (2006). A mechanistic account of striatal dopamine function in human cognition: psychopharmacological studies with cabergoline and haloperidol. *Behav Neurosci*, *120*(3), 497–517. <https://doi.org/10.1037/0735-7044.120.3.497>
- Frey, A. L., & McCabe, C. (2020). Effects of serotonin and dopamine depletion on neural prediction computations during social learning. *Neuropsychopharmacology*, *45*(9), 1431–1437.  
<https://doi.org/10.1038/s41386-020-0678-z>
- Garvert, M. M., Moutoussis, M., Kurth-Nelson, Z., Behrens, T. E. J., & Dolan, R. J. (2015). Learning-Induced plasticity in medial prefrontal cortex predicts preference malleability. *Neuron*, *85*(2), 418–428. <https://doi.org/10.1016/j.neuron.2014.12.033>
- Gläscher, J., Daw, N., Dayan, P., & Doherty, J. P. O. (2011). States versus Rewards: Dissociable neural prediction error signals underlying model-based and model-free reinforcement learning. *Neuron*, *66*(4), 585–595. <https://doi.org/10.1016/j.neuron.2010.04.016>



- Glimcher, P. W., & Bayer, H. M. (2005). Midbrain dopamine neurons encode a quantitative reward prediction error signal. *Neuron*, *103*(11), 2304–2312. <https://doi.org/10.1038/mp.2011.182>.doi
- Grace, A. A. (2002). Dopamine. In *Neuropsychopharmacology: The Fifth Generation of Progress* (pp. 120–132).
- Haarsma, J., Fletcher, P., Ziauddeen, H., Spencer, T., & Diederer, K. (2018). Precision weighting of cortical unsigned prediction errors is mediated by dopamine and benefits. *BioRxiv*, 1–24. <https://doi.org/10.1101/288936>
- Heyes, C. M. (2012). What's social about social learning? *Journal of Comparative Psychology*, *126*(2), 193–202. <https://doi.org/10.1037/a0025180>
- Heyes, C. M., & Pearce, J. M. (2015). Not-so-social learning strategies. *Proceedings of the Royal Society B: Biological Sciences*, *282*(1802). <https://doi.org/10.1098/rspb.2014.1709>
- Hill, M. R., Boorman, E. D., & Fried, I. (2016). Observational learning computations in neurons of the human anterior cingulate cortex. *Nature Communications*, *7*, 12722. <https://doi.org/10.1038/ncomms12722>
- Jones, J. L., Esber, G. R., McDannald, M. A., Gruber, A. J., Hernandez, A., Mirenzi, A., & Schoenbaum, G. (2012). Orbitofrontal cortex supports behavior and learning using inferred but not cached values. *Science*, *338*(6109), 953–956. <https://doi.org/10.1126/science.1227489>
- Kendal, R. L., Boogert, N. J., Rendell, L., Laland, K. N., Webster, M., & Jones, P. L. (2018). Social learning strategies: Bridge-building between fields. *Trends in Cognitive Sciences*, *22*(7), 651–665. <https://doi.org/10.1016/j.tics.2018.04.003>
- Klucharev, V., Hytönen, K., Rijpkema, M., Smidts, A., & Fernández, G. (2009). Reinforcement learning signal predicts social conformity. *Neuron*, *61*(1), 140–151. <https://doi.org/10.1016/j.neuron.2008.11.027>
- Laland, K. N. (2004). Social learning strategies. *Learning & Behaviour*, *32*(1), 4–14. <https://doi.org/10.1063/1.470327>
- Langdon, A. J., Sharpe, M. J., Schoenbaum, G., & Niv, Y. (2018). Model-based predictions for dopamine. *Current Opinion in Neurobiology*, *49*, 1–7. <https://doi.org/10.1016/j.conb.2017.10.006>
- Lee, M. D., & Wagenmakers, E. J. (2013). Bayesian cognitive modeling: A practical course. In *Bayesian Cognitive Modeling: A Practical Course*. Cambridge University Press. <https://doi.org/10.1017/CBO9781139087759>
- Li, J., Delgado, M. R., & Phelps, E. A. (2011). How instructed knowledge modulates the neural systems of reward learning. *Proceedings of the National Academy of Sciences of the United States of America*, *108*(1), 55–60. <https://doi.org/10.1073/pnas.1014938108>

- Lidow, M. S., Goldman-Rakic, P. S., Gallager, D. W., & Rakic, P. (1991). Distribution of dopaminergic receptors in the primate cerebral cortex: Quantitative autoradiographic analysis using [3H]raclopride, [3H]spiperone and [3H]SCH23390. *Neuroscience*, *40*(3), 657–671.  
[https://doi.org/10.1016/0306-4522\(91\)90003-7](https://doi.org/10.1016/0306-4522(91)90003-7)
- Lindström, B., Haaker, J., & Olsson, A. (2018). A common neural network differentially mediates direct and social fear learning. *NeuroImage*, *167*(March 2017), 121–129.  
<https://doi.org/10.1016/j.neuroimage.2017.11.039>
- Manning, C., Kilner, J., Neil, L., Karaminis, T., & Pellicano, E. (2017). Children on the autism spectrum update their behaviour in response to a volatile environment. *Developmental Science*, *20*(5).  
<https://doi.org/10.1111/desc.12435>
- Menon, M., Jensen, J., Vitcu, I., Graff-Guerrero, A., Crawley, A., Smith, M. A., & Kapur, S. (2007). Temporal Difference Modeling of the Blood-Oxygen Level Dependent Response During Aversive Conditioning in Humans: Effects of Dopaminergic Modulation. *Biological Psychiatry*, *62*(7), 765–772. <https://doi.org/10.1016/j.biopsych.2006.10.020>
- Moran, R., Dayan, P., & Dolan, R. J. (2021). Human subjects exploit a cognitive map for credit assignment. *Proceedings of the National Academy of Sciences of the United States of America*, *118*(4), 1–12. <https://doi.org/10.1073/pnas.2016884118>
- Morgan, T. J. H., Rendell, L. E., Ehn, M., Hoppitt, W., & Laland, K. N. (2012). The evolutionary basis of human social learning. *Proceedings of the Royal Society B: Biological Sciences*, *279*(1729), 653–662. <https://doi.org/10.1098/rspb.2011.1172>
- Nicolle, A., Klein-Flügge, M. C., Hunt, L. T., Vlaev, I., Dolan, R. J., & Behrens, T. E. J. (2012). An agent independent axis for executed and modeled choice in medial prefrontal cortex. *Neuron*, *75*(6), 1114–1121. <https://doi.org/10.1016/j.neuron.2012.07.023>
- O’Doherty, J. P., Dayan, P., Friston, K., Critchley, H., & Dolan, R. J. (2003). Temporal difference models and reward-related learning in the human brain. *Neuron*, *38*(2), 329–337.  
[https://doi.org/10.1016/S0896-6273\(03\)00169-7](https://doi.org/10.1016/S0896-6273(03)00169-7)
- Pessiglione, M., Seymour, B., Flandin, G., Dolan, R. J., & Frith, C. D. (2006). Dopamine-dependent prediction errors underpin reward-seeking behaviour in humans. *Nature*, *442*(7106), 1042–1045. <https://doi.org/10.1038/nature05051>
- Rendell, L., Fogarty, L., Hoppitt, W. J. E., Morgan, T. J. H., Webster, M. M., & Laland, K. N. (2011). Cognitive culture: Theoretical and empirical insights into social learning strategies. *Trends in Cognitive Sciences*, *15*(2), 68–76. <https://doi.org/10.1016/j.tics.2010.12.002>
- Rescorla, R. A., & Wagner, A. R. (1972). A theory of Pavlovian conditioning: Variations in the effectiveness of reinforcement and nonreinforcement. In *Classical conditioning II: current*

- research and theory* (pp. 64–99). Appleton Century Crofts.
- Richerson, P. J., & Boyd, R. (2005). *Not By Genes Alone: How Culture Transformed Human Evolution*. The University of Chicago Press.
- Roberts, C., Sahakian, B. J., & Robbins, T. W. (2020). Psychological mechanisms and functions of 5-HT and SSRIs in potential therapeutic change: Lessons from the serotonergic modulation of action selection, learning, affect, and social cognition. *Neuroscience and Biobehavioral Reviews*, *119*(April), 138–167. <https://doi.org/10.1016/j.neubiorev.2020.09.001>
- Rouder, J. N., Morey, R. D., Speckman, P. L., & Province, J. M. (2012). Default Bayes factors for ANOVA designs. *Journal of Mathematical Psychology*, *56*(5), 356–374. <https://doi.org/10.1016/j.jmp.2012.08.001>
- Sadacca, B. F., Jones, J. L., & Schoenbaum, G. (2016). Midbrain dopamine neurons compute inferred and cached value prediction errors in a common framework. *ELife*, *5*(MARCH2016), 1–13. <https://doi.org/10.7554/eLife.13665>
- Schmitz, Y., Benoit-Marand, M., Gonon, F., & Sulzer, D. (2003). Presynaptic regulation of dopaminergic neurotransmission. *Journal of Neurochemistry*, *87*(2), 273–289. <https://doi.org/10.1046/j.1471-4159.2003.02050.x>
- Schultz, W. (2007). Behavioral dopamine signals. *Trends in Neurosciences*, *30*(5), 203–210. <https://doi.org/10.1016/j.tins.2007.03.007>
- Schultz, W., Dayan, P., & Montague, P. R. (1997). A neural substrate of prediction and reward. *Science*, *275*(5306), 1593–1599. <https://doi.org/10.1126/science.275.5306.1593>
- Sharpe, M. J., & Schoenbaum, G. (2018). Evaluation of the hypothesis that phasic dopamine constitutes a cached-value signal. *Neurobiology of Learning and Memory*, *153*(July 2017), 131–136. <https://doi.org/10.1016/j.nlm.2017.12.002>
- Sternberg, S. (1969). Memory-scanning: mental processes revealed by reaction-time experiments. *American Scientist*, *57*(4), 421–457.
- Sutton, R., & Barto, A. G. (2018). *Reinforcement learning: An introduction*. (2nd ed.). MIT press.
- Tarantola, T., Kumaran, D., Dayan, P., & De Martino, B. (2017). Prior preferences beneficially influence social and non-social learning. *Nature Communications*, *8*(1), 817. <https://doi.org/10.1038/s41467-017-00826-8>
- Templeton, J. J., Kamil, A. C., & Balda, R. P. (1999). Sociality and social learning in two species of corvids: The pinyon jay (*Gymnorhinus cyanocephalus*) and the Clark’s nutcracker (*Nucifraga columbiana*). *Journal of Comparative Psychology*, *113*(4). <https://doi.org/10.1037/0735-7036.113.4.450>
- Van Den Bergh, D., Van Doorn, J., Marsman, M., Draws, T., Van Kesteren, E. J., Derks, K., Dablander,

F., Gronau, Q. F., Kucharský, Š., Gupta, A. R. K. N., Sarafoglou, A., Voelkel, J. G., Stefan, A., Ly, A., Hinne, M., Matzke, D., & Wagenmakers, E. J. (2020). A tutorial on conducting and interpreting a bayesian ANOVA in JASP. *Annee Psychologique*, *120*(1), 73–96.

<https://doi.org/10.3917/anpsy1.201.0073>

Zhang, L., & Gläscher, J. (2020). A brain network supporting social influences in human decision-making. *Science Advances*, *6*(34), 1–20. <https://doi.org/10.1126/sciadv.abb4159>

1 **Appendix 1**

2

3 *Inclusion criteria*

4 Participant is willing and able to give informed consent for participation in the study.

5 Aged between 18 and 45.

6 BMI in the range of 18.5 – 29.5

7 Resting blood pressure in the range of 90/60 (low) to 140/90 (high)

8 Electrocardiogram QT (heart rate corrected) interval < .42

9

10 *Exclusion criteria*

11 Participation in another drug study in the 3 weeks previous.

12 Personal or first-degree family history of cardiovascular disease, specifically hypotension,  
13 arrhythmias or valvular disease, stroke

14 Neurological abnormalities or traumas, kidney disease or liver disease

15 Inherited blood conditions

16 Psychiatric or psychological conditions (including depression and anxiety disorders)

17 Known learning disability

18 Anybody found to have an elongated Q-T interval following single lead ECG examination

19 Low heart rate

20 Low or high blood pressure

21 Any regular medication - excluding the oral contraceptive pill

22 Recent recreational drugs use or alcohol and drug dependency

23 Known allergy to any medication

24 Current pregnancy or breastfeeding

25 Previous participant in a drug study

26 Lack of sleep in last 24 hours.

27 Lack of food or drink in last 12 hours

28 Primary sensory impairment (e.g., uncorrected visual or hearing impairment)

29 Lactose intolerant

30 Insufficient English to be able to consent to take part in the study

31

32

33

34 *Baseline cognitive measures and mood ratings*

35

36 Approximately one week prior to drug/placebo administration, participants completed a battery of

37 self-report questionnaire measures: Autism Spectrum quotient (AQ)<sup>1</sup>, Toronto Alexithymia Scale

38 (TAS 20)<sup>2</sup>, Behavioural Inhibition/Activation Scale (BIS-BAS)<sup>3</sup>, the Depression Anxiety and Stress Scale

39 (DASS 21)<sup>4</sup>, Interpersonal Reactivity Index (IRI)<sup>5</sup>, Beck's Depression Inventory (BDI)<sup>6</sup> and Body

40 Perception Questionnaire (BPQ)<sup>7</sup>. Self-report questionnaire scores are summarised in Supplemental

41 Table 1. The individual-primary group did not differ significantly on any measure from the social-

42 primary group. The group that received HAL on day 1 did not differ significantly on any of the  
 43 baseline measures from the group that received PLA on day 1 ( $p < 0.05$ ). Mood and fatigue were  
 44 monitored three times per day during each test day, i) before capsule intake, ii) two hours post-  
 45 capsule intake upon start task battery, and iii) upon completion of the task battery. The mood  
 46 ratings consisted of the Positive and Negative Affect Scale (PANAS)<sup>8</sup>. A self-report scale was used to  
 47 monitor fatigue. 24% of participants reported that they did not know on which day they had taken  
 48 an active drug. Out of the remaining participants, 84% of participants correctly reported that they  
 49 thought they had received an active drug. No adverse side effects were reported. Blood pressure,  
 50 heart rate and blood oxygenation levels were monitored five times over the course of the testing  
 51 days; before drug/placebo administration, and then at one, two and three and a half hour intervals  
 52 thereafter. Measures were taken for a final time immediately before the end of the testing day.

53

54 Supplemental Table 1. Self-report questionnaire scores for the individual-primary and social-primary  
 55 groups (n = 33)

56

57

| <i>Self-report questionnaires</i> | <i>Individual-primary group</i> | <i>Social-primary group</i> | <i>t (31)</i> | <i>p-value</i> |
|-----------------------------------|---------------------------------|-----------------------------|---------------|----------------|
| AQ                                | 9.412 (4.556)                   | 6.500 (4.179)               | 1.910         | 0.065          |
| TAS-20                            | 39.529 (6.947)                  | 40.313 (7.981)              | -0.301        | 0.765          |
| BIS-BAS                           | 50.647 (6.855)                  | 51.125 (5.536)              | -0.219        | 0.828          |
| DASS-Stress                       | 3.176 (4.231)                   | 3.875 (2.306)               | -0.583        | 0.723          |
| DASS-Anxiety                      | 1.353 (2.178)                   | 1.938 (2.516)               | -0.715        | 0.564          |
| DASS-Depression                   | 1.706 (1.863)                   | 2.313 (3.005)               | -0.702        | 0.480          |
| IRI                               | 66.235(15.114)                  | 66.375(10.645)              | -0.031        | 0.976          |
| BDI                               | 3.176 (3.746)                   | 3.438 (2.732)               | -0.227        | 0.822          |
| BPQ                               | 52.176(29.473)                  | 46.688(18.650)              | 0.635         | 0.221          |

58 *Note:* Mean (standard deviation) scores are reported. Significance level for the between-group  
 59 differences are reported. Autism Spectrum quotient (AQ)<sup>1</sup>, Toronto Alexithymia Scale (TAS 20)<sup>2</sup>,  
 60 Behavioural Inhibition/Activation Scale (BIS-BAS)<sup>3</sup>, the Depression Anxiety and Stress Scale (DASS  
 61 21)<sup>4</sup>, Interpersonal Reactivity Index (IRI)<sup>5</sup>, Beck's Depression Inventory (BDI)<sup>6</sup> and Body Perception  
 62 Questionnaire (BPQ)<sup>7</sup>.

63

64 *Drug effects on mood and tiredness*

65 Positive and negative affect (PANAS) scores were submitted to separate RM-ANOVAs, with within-  
 66 subjects (WS) factors time (baseline/start testing/end testing) and drug (HAL/PLA). For both positive  
 67 and negative scores, a main effect of time was observed. Both positive ( $F(2,62) = 8.286$ ,  $p < 0.001$ ,  
 68  $\eta_p^2 = 0.211$ ), and negative scores decreased over time ( $F(2,62) = 6.020$ ,  $p = 0.004$ ,  $\eta_p^2 = 0.163$ ). A drug  
 69 by time interaction was observed for positive scores ( $F(2,62) = 7.353$ ,  $p = 0.001$ ,  $\eta_p^2 = 0.192$ ), with

70 simple effects analysis demonstrating that positive scores decreased over time under haloperidol ( $p$   
71  $< 0.001$ ), but not placebo ( $p = 0.994$ ). A main effect of drug was observed on negative scores ( $F$   
72  $(1,31) = 4.749$ ,  $p = 0.037$ ,  $\eta_p^2 = 0.133$ ), with higher negative affect scores under haloperidol ( $\bar{x}$  ( $\sigma_{\bar{x}} =$   
73  $10.771$  ( $0.557$ )) compared with placebo ( $\bar{x}$  ( $\sigma_{\bar{x}} = 9.491$ ( $0.557$ )).

74 Self-reported fatigue ratings (Likert scale: 1-10, with higher scores referring to higher levels of  
75 fatigue) were submitted to a RM-ANOVA, with WS factors time (T1-T5) and drug (HAL/PLA). A main  
76 effect of time was observed, with fatigue rising across time ( $F(4,88) = 6.652$ ,  $p < 0.001$ ,  $\eta_p^2 = 0.232$ ).  
77 No main or interaction effect(s) involving drug were observed.

78

## 79 **Appendix 2**

80

### 81 *Randomisation groups*

82

83 For both the social-primary and individual-primary group, the probability of reward associated with  
84 the blue/green stimuli (individual information) and the red stimuli (social information) were  
85 governed by different pseudo-randomisation schedules, adapted from Behrens et al<sup>9</sup>. Schedules  
86 were counterbalanced between participants to ensure that learning could not be explained in terms  
87 of differences in learning between schedules with increased/decreased, or early/late occurring,  
88 volatility. The individual-primary group (schedules 1,3) were sub-divided into two groups, such that  
89 half started with predominantly correct social information, and half with predominantly incorrect  
90 social information, with the same true for the social-primary group (schedules 2,4). The primary  
91 information source was always less volatile overall compared to the secondary information source,  
92 irrespective of whether it was social or individual. To give an example, the randomisation schedule  
93 for group 1 was the same as that employed by Behrens et al<sup>9</sup>. During the first 60 trials, the individual  
94 reward history was stable, with a 75% probability of blue being correct. During the next 60 trials, the  
95 reward history was volatile, switching between 80% green correct and 80% blue correct every 20  
96 trials. Meanwhile, during the first 30 trials, social information was stable, with 75% of choices being  
97 correct. During the next 40 trials, the social information was volatile, switching between 80%  
98 incorrect and 80% correct every 10 trials. During the final 50 trials, social information was once again  
99 stable, with 85% of choices being incorrect. Randomisation schedules for groups 2, 3, and 4 were  
100 inverted and counterbalanced versions of schedule 1 (Suppl. Fig. 1).

101

102

103 **Supplemental Figure 1.**

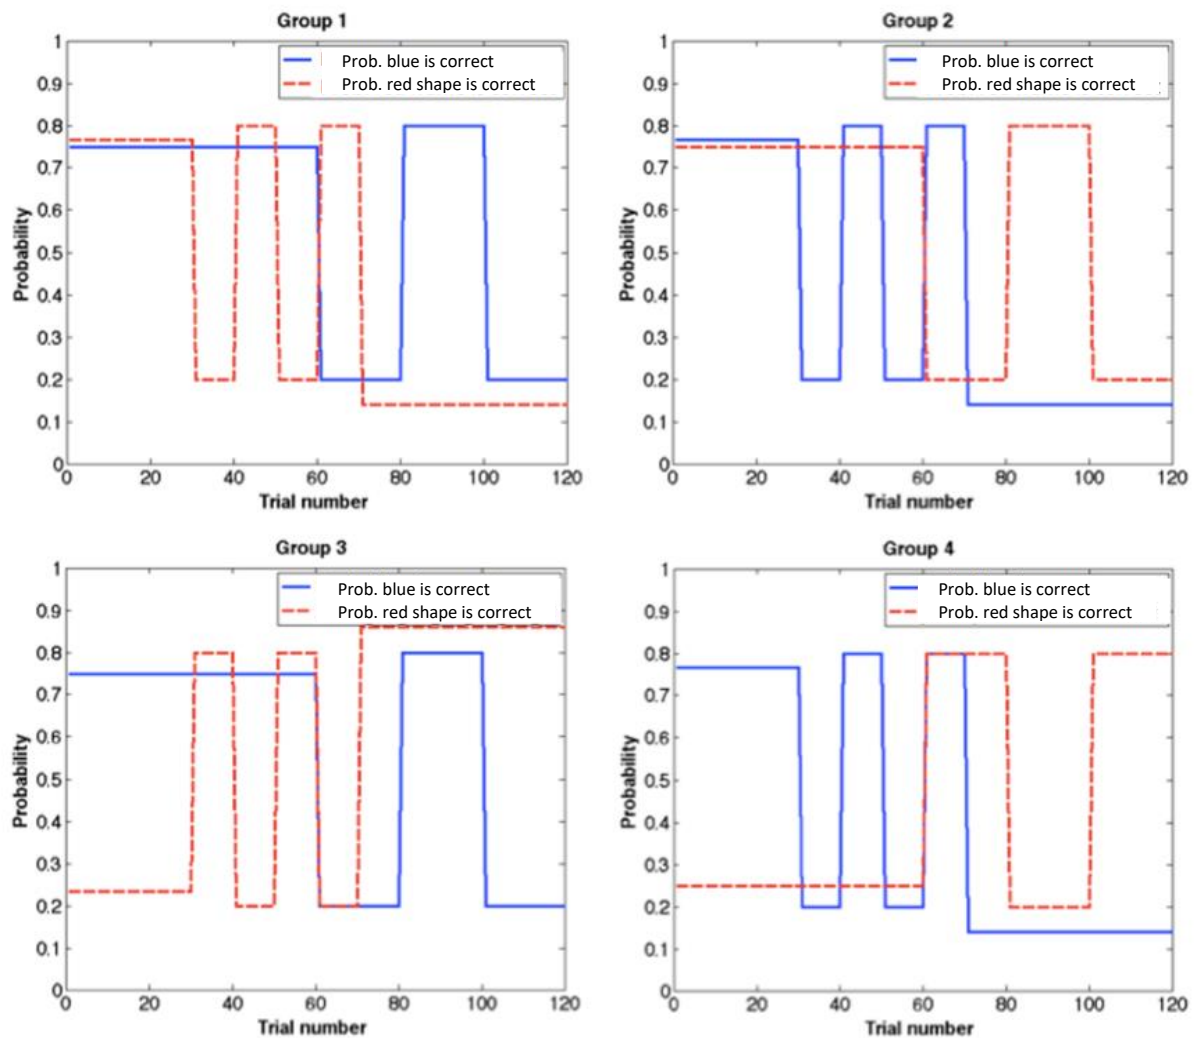

104

**Suppl. Figure 1. Randomisation schedules.** The probability of reward varied according to probabilistic schedules, including stable and volatile blocks for both the probability of blue being correct and the probability of the social information indicating the correct answer. Probability schedules were counterbalanced between participants. Solid blue lines show the probability of blue being the correct choice, dashed red lines show the probability of the social information being correct. Schedules 1-4 are displayed here.

105

106



107 **Appendix 3**

108

109 *Model fitting*

110

111 Optimisation of free parameter values was performed as per Cook and colleagues<sup>10</sup>, using a quasi-  
112 Newton optimisation algorithm specified in TAPAS toolbox - `quasinewton_optim_config.m`. The  
113 function maximised the log-joint posterior density over all parameters given the data and the  
114 generative model.  $\alpha$  values were estimated in logit space (see `tapas_logit.m`), i.e., a logistic sigmoid  
115 transformation of native space ( $\text{tapas\_logit}(x) = \ln(x/(1-x))$ ;  $x = 1/(1+\exp(-\text{tapas\_logit}(x)))$ ). An  
116 uninformative prior, allowing for individual differences in learning rate was used for  $\alpha$ : `tapas_logit`  
117 (0.2, 1), with a variance of 1. Initial values were set at logit (0.5, 1), with a variance of 1. Initial values  
118 were allowed to vary, to allow for inter-individual differences in prior preferences for the extent to  
119 which individual would conform to the group choice. The prior for  $\beta$  was set to log (48), with a  
120 variance of 1, and the prior for  $\zeta$  was set at 0 with a variance of  $10^2$  (logit space), i.e., an equal  
121 weighting for information derived from primary and secondary learning (0.5). Prior choices were  
122 based on previous work<sup>10</sup>. Maximum-a-posteriori (MAP) estimates for all model parameters were  
123 calculated using the HGF toolbox version 3 (<https://osf.io/398w4/files/>). All code used is adapted  
124 from the open-source software package TAPAS (available  
125 at <http://www.translationalneuromodeling.org/tapas>).

126

127 *Model comparison*

128

129 We based our choice of perceptual model on previous work by Cook and others<sup>10</sup>, wherein a  
130 systematic comparison of three alternative models was conducted, to determine which best  
131 explained observed choice behaviour. Here we repeated Cook et al.'s model comparison and added  
132 four further extensions of the classic model, thus we compared eight alternative models in total. A  
133 formal model comparison was carried out using Bayesian model selection using the VBA toolbox<sup>11</sup>.

134

135 Data were initially analysed with eight models. All models were variations of the classic Rescorla-  
136 Wagner model. Group level Bayesian model selection (BMS) was used to evaluate which model  
137 provided the (relative) best fit to the observed data. The VBA toolbox<sup>12</sup>, specifically random-effects  
138 BMS (using the `VBA_groupBMC_btWConds.m` function), was utilised. Random effects group BMS  
139 computes an approximation of the model evidence relative to the other models, i.e., the probability  
140 of the data  $y$  given a model  $m$ ,  $p(y/m)$ , with log model evidence here approximated with F values.  
141 The posterior probability that a model has generated the observed data, relative to other models is

142 estimated, and the exceedance probability, or the likelihood that a given model is more likely than  
143 other included models in the set, is estimated. Analysis across both conditions allows us to test the  
144 hypothesis that the same model produced observed data under both haloperidol and placebo  
145 conditions.

146  
147

148 Model 1 was a classic Rescorla-Wagner model:

149

$$V_{(i+1)} = V_i + \alpha \varepsilon_i$$

150

151 with  $\varepsilon_i = r_i - V_i$ , the difference between the actual and the expected reward or prediction error  
152 (PE).

153

154 Model 2 was an extension of Model 1, with separate learning rates ( $\alpha$ ) for learning from primary  
155 value and secondary value learning sources:

156

$$V_{primary(i+1)} = V_{primary(i)} + \alpha_{primary} \varepsilon_i$$
$$V_{secondary(i+1)} = V_{secondary(i)} + \alpha_{secondary} \varepsilon_i$$

157

158

159 Model 3 had a single learning rate  $\alpha$  for primary/secondary learning, but separate learning rates for  
160 volatile and stable blocks:

161

$$V_{(i+1)} = V_i + \alpha_{volatile} \varepsilon_i + \alpha_{stable} \varepsilon_i$$

162

163 Model 4 had four separate learning rates  $\alpha$  for volatile and stable and primary and secondary  
164 learning:

$$V_{primary(i+1)} = V_{primary(i)} + \alpha_{primary\_volatile} \varepsilon_i + \alpha_{primary\_stable} \varepsilon_i$$
$$V_{secondary(i+1)} = V_{secondary(i)} + \alpha_{secondary\_volatile} \varepsilon_i + \alpha_{secondary\_stable} \varepsilon_i$$

165

166 As an exploratory measure, we further extended Models 1-4 to include separate learning rates  
167 corresponding to learning from rewarded trials and unrewarded trials separately, i.e., learning from  
168 wins and losses.

169

170

171 Model 5:

$$V_{(i+1)} = V_i + \alpha_{reward} \varepsilon_i + \alpha_{unreward} \varepsilon_i$$

172

173

174 Model 6:

$$V_{primary(i+1)} = V_{primary(i)} + \alpha_{primary\_reward} \varepsilon_i + \alpha_{primary\_unreward} \varepsilon_i$$

$$V_{secondary(i+1)} = V_{secondary(i)} + \alpha_{secondary\_reward} \varepsilon_i + \alpha_{secondary\_unreward} \varepsilon_i$$

175 Model 7:

$$V_{(i+1)} = V_i + \alpha_{volatile\_reward} \varepsilon_i + \alpha_{stable\_reward} \varepsilon_i + \alpha_{volatile\_unreward} \varepsilon_i + \alpha_{stable\_unreward} \varepsilon_i$$

176

177 Model 8:

178

$$V_{primary(i+1)} = V_{primary(i)} + \alpha_{primary\_volatile\_reward} \varepsilon_i + \alpha_{primary\_stable\_reward} \varepsilon_i +$$

$$+ \alpha_{primary\_volatile\_unreward} \varepsilon_i + \alpha_{primary\_stable\_unreward} \varepsilon_i$$

181

$$V_{secondary(i+1)} = V_{secondary(i)} + \alpha_{secondary\_volatile\_reward} \varepsilon_i + \alpha_{secondary\_stable\_reward} \varepsilon_i + \alpha_{secondary\_volatile\_unreward} \varepsilon_i + \alpha_{secondary\_stable\_unreward} \varepsilon_i$$

182

183

184 We ran a between-groups model comparison, to ensure that the same model could explain the  
185 observed data under both placebo and haloperidol. When comparing all models, Model 4 performed  
186 best, with an exceedance probability approaching 1. The exceedance probability that the same  
187 model (Model 4) had produced data under both conditions was equal to 1. For condition 1 (placebo),  
188 the posterior probabilities that the observed data had produced the model was equal to 10.329 for  
189 Model 3 and 12.998 for Model 4, with the probability that the data was produced by the winning  
190 model  $p(H1|y) = 0.762$ . For group 2 (haloperidol), Model 4 had a posterior probability of 15.417  
191 ( $p(H1|y) = 0.998$ ). For the between-groups assessment, the posterior probability  $p(H1|y) = 0.999$   
192 and the protected exceedance probability ( $\phi$ ) was equal to 0.999.

193

194

195

196

197 **Supplemental Figure 2**

198

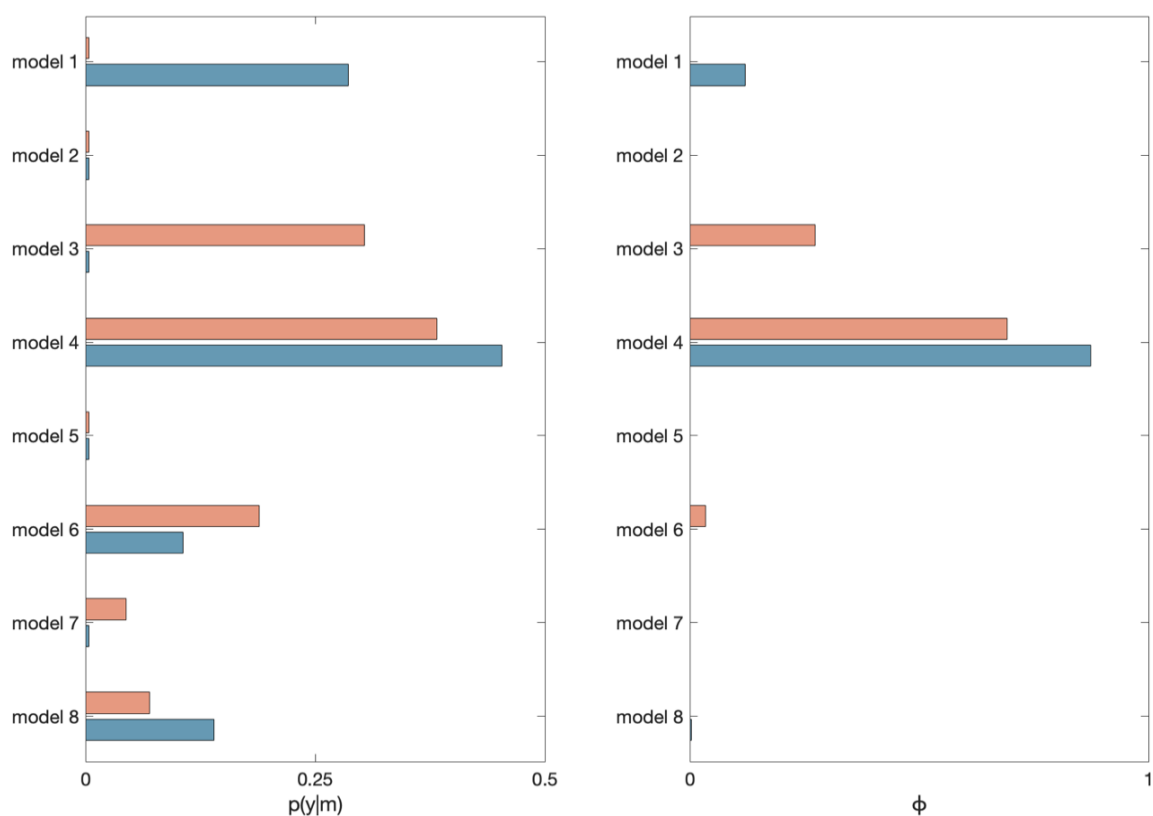

199

200

**Suppl. Figure 2. Model comparison.** Results from random-effects Bayesian model selection. Exceedance Probability and posterior model probability for models 1-8.  $p(y|m)$  = posterior model probability,  $\phi$  = exceedance probability, HAL = blue, PLA = red.

201

202

203 *Model Validation*

204 To demonstrate that the chosen model (model 4) accurately described participant behaviour, we  
205 simulated response data for each participant, using estimated model parameter values  
206 (tapas\_simModel.m). Accuracy did not significantly differ between actual and simulated accuracy for  
207 PLA ( $t = -0.866$ ,  $p = 0.394$ ) or HAL conditions ( $t = -0.280$ ,  $p = 0.781$ ) (Suppl. Fig. 3A). Simulated and  
208 calculated accuracy were significantly correlated for each participant, under both placebo ( $r = 0.487$ ,  
209  $p = 0.005$ ) and haloperidol conditions ( $r = 0.712$ ,  $p < .001$ ) (Suppl. Fig. 3B).

210

211

212 **Supplemental Figure 3**

213 **A**

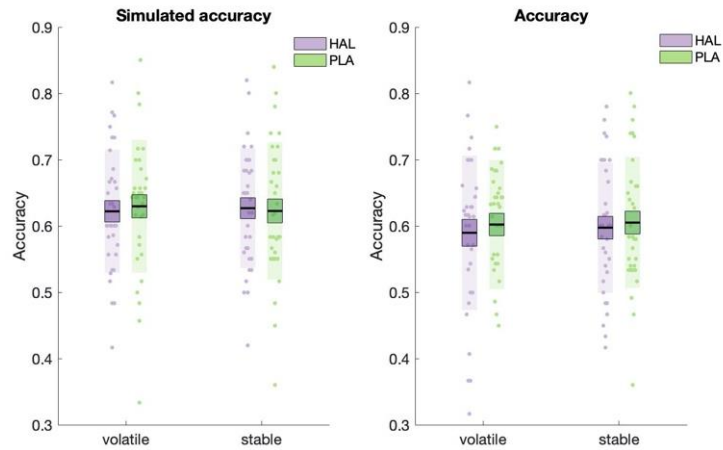

214 **B**

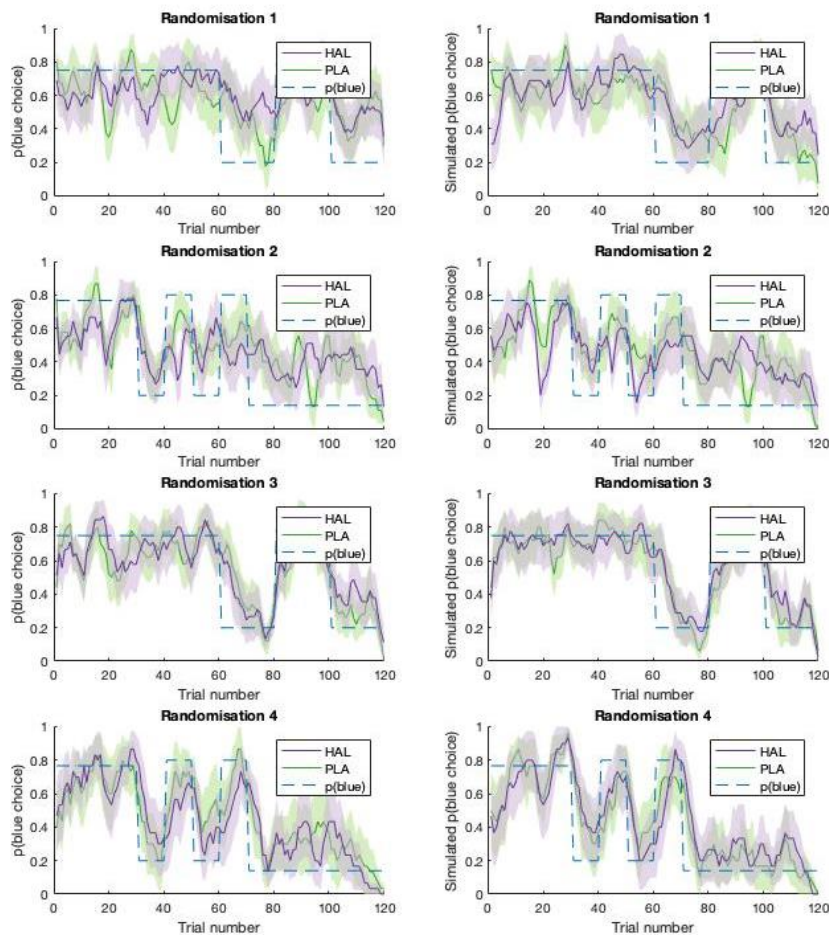

215  
216

**Suppl. Fig. 3. A.** Model simulations (left) and participant response data (right). Mean accuracy is displayed separately for volatile and stable environmental phases, under HAL (purple) and PLA (green). Boxes = standard error of the mean, shaded region = standard deviation, individual datapoints are displayed. HAL = haloperidol, PLA = placebo.

**B.** Participant data (left) juxtaposed against model simulations (right) Running average, across 5 trials of blue choices for probabilistic randomisation schedules 1 to 4. Shaded region = standard error of the mean.

217 To ensure that parameter estimates could be recovered, model parameters were estimated from  
218 simulated data for each participant, separately for HAL and PLA conditions. All recovered parameters  
219 correlated significantly with estimated parameters under both treatment conditions (all  $p < 0.001$ ).

220  
221  
222

## 223 **Appendix 4**

224

### 225 *Extended statistical analyses*

226

#### 227 *i. Learning rate analysis (n = 41)*

228 A RM-ANOVA, with (square-root transformed) learning rate ( $\alpha$ ) as the DV and predictors information  
229 source, volatility, drug and group was carried out on estimates from the mixed model analysis which  
230 included all participants who completed at least one study day (N = 41). A significant main effect of  
231 information was observed (F (1,234) = 3.944,  $p = 0.048$ , beta estimate ( $\sigma_{\bar{x}}$ ) = 0.019 (0.010),  $t = 1.986$ ,  
232 CI [0 - 0.04]), with higher mean values for  $\alpha_{\text{primary}}$  (estimate (SE) = 0.429 (0.018)) compared with  
233  $\alpha_{\text{secondary}}$  (estimate (SE) = 0.391 (0.018)).

234

235 A significant volatility by information interaction (F (1, 234) = 4.676,  $p = 0.032$ , beta estimate (SE) =  
236 0.021 (0.010),  $t = -2.162$ , CI [0 - 0.04]) was observed. Post hoc comparisons revealed that, under  
237 stable phases,  $\alpha_{\text{primary}}$  values (estimate (SE) = 0.461 (0.023)) were significantly greater than  $\alpha_{\text{secondary}}$   
238 (estimate (SE) = 0.381 (0.023),  $z = 2.933$ ,  $p_{\text{holm}} = 0.007$ ), with no difference between  $\alpha$  in volatile  
239 environmental phases ( $z = -0.125$ ,  $p_{\text{holm}} = 0.901$ ). No main effect of group was observed, however,  
240 there was a significant information by group interaction (F (1, 234) = 32.471,  $p < 0.001$ , beta  
241 estimate (SE) = 0.05 (0.010),  $t = 5.700$ , CI [0.04-0.07]). Post hoc comparisons revealed that, for the  
242 individual-primary group,  $\alpha_{\text{primary}}$  (estimate (SE) = 0.455 (0.026)) was significantly greater than  
243  $\alpha_{\text{secondary}}$  (estimate (SE) = 0.307 (0.026),  $z = 5.351$ ,  $p_{\text{holm}} < 0.001$ ). For the social-primary group,  
244 however,  $\alpha_{\text{secondary}}$  (estimate (SE) = 0.475 (0.025)) was significantly greater than  $\alpha_{\text{primary}}$  (estimate (SE)  
245 = 0.404 (0.025),  $z = 2.667$ ,  $p_{\text{holm}} = 0.015$ ).

246

247 A significant volatility by group interaction was observed (F (1,234) = 4.168,  $p = 0.042$ , beta estimate  
248 (SE) = 0.020 (0.010),  $t = 2.042$ , CI [0 - 0.04]). For the individual-primary group,  $\alpha_{\text{volatile}}$  (estimate (SE) =  
249 0.351 (0.026)) showed a non-significant trend towards being lower than  $\alpha_{\text{stable}}$  (estimate (SE) = 0.411  
250 (0.026),  $z = -2.192$ ,  $p_{\text{holm}} < 0.057$ ). For the social-primary group, however,  $\alpha_{\text{volatile}}$  (estimate (SE) =  
251 0.449 (0.025)) and  $\alpha_{\text{stable}}$  (estimate (SE) = 0.431 (0.025)) did not significantly differ ( $z = 0.672$ ,  $p_{\text{holm}} =$   
252 0.502).

253

254 Most importantly, as with the analysis reported in the main text, a significant drug by information  
255 interaction was observed ( $F(1,234) = 3.727$ ,  $p = 0.054$ , beta estimate (SE) = 0.01 (0.1),  $t = 1.69$ , CI  
256 [0.00 – 0.04]. Post hoc comparisons demonstrated that, under PLA there was a significant difference  
257 between  $\alpha_{\text{primary}}$  (estimate (SE) = 0.451 (0.023) and  $\alpha_{\text{secondary}}$  (estimate (SE) = 0.375 (0.023),  $z = 2.727$ ,  
258  $p_{\text{holm}} = 0.026$ , uncorrected  $p = 0.006$ ). This difference was nullified under HAL ( $\alpha_{\text{primary}}$  estimate (SE) =  
259 0.408 (0.023) and  $\alpha_{\text{secondary}}$  (estimate (SE) = 0.407 (0.023)) ( $z = 0.040$ ,  $p_{\text{holm}} = 0.968$ , uncorrected  $p =$   
260 0.968).

261

262 There was no significant group x information source x drug interaction ( $F(1,234) = 0.029$ ,  $p = 0.866$ ,  
263 beta estimate (SE) = -0.002 (0.010),  $t = -0.169$ , CI [-0.02 - 0.02]).

264

### 265 *ii. Accuracy*

266 An analysis of accuracy was conducted in participants who had completed both study days ( $n=31$ ), to  
267 explore whether there was any systematic variation as a function of randomization schedule, and  
268 across drug and placebo conditions and volatile and stable phases. A RM-ANOVA, with within-  
269 subjects factors drug (HAL, PLA) and volatility (stable, volatile), and between-subjects factor group  
270 (social-primary, individual-primary) and randomisation schedule (1-4), demonstrated no difference  
271 in accuracy between haloperidol ( $\bar{x}(\sigma_{\bar{x}}) = 0.601(0.011)$ ), and placebo ( $\bar{x}(\sigma_{\bar{x}}) = 0.614(0.011)$ );  $F(1,27)$   
272 = 1.161,  $p = 0.291$ ,  $\eta_p^2 = 0.041$ ). However, a significant main effect of schedule was observed ( $F$   
273 (3,27) = 3.004,  $p = 0.048$ ,  $\eta_p^2 = 0.250$ ), with the lowest accuracy observed for schedule 1 ( $\bar{x}(\sigma_{\bar{x}}) =$   
274 0.558 (0.019). Although accuracy for schedule 1 was lower than for schedule 2 ( $\bar{x}(\sigma_{\bar{x}}) = 0.619$   
275 (0.018),  $t(27) = -2.358$ ,  $p_{\text{holm}} = 0.129$ ), schedule 3 ( $\bar{x}(\sigma_{\bar{x}}) = 0.614(0.018)$ ,  $t(27) = (-2.162)$ ,  $p_{\text{holm}} =$   
276 0.159) and schedule 4 ( $\bar{x}(\sigma_{\bar{x}}) = 0.637(0.020)$ ,  $t(27) = -2.748$ ,  $p_{\text{holm}} = 0.063$ ); these differences were  
277 no longer significant after correction for multiple comparisons. Mean accuracy for schedules 2-4 did  
278 not significantly differ from each other (all  $p$ -values = 1.000). In addition, there was a significant  
279 interaction effect between schedule and volatility ( $F(3,27) = 7.527$ ,  $p < 0.001$ ,  $\eta_p^2 = 0.455$ ). For all  
280 schedules except for schedule 3, there was no significant difference in accuracy between volatile and  
281 stable phases (all  $p > 0.05$ ). However, for schedule 3, accuracy was significantly higher for volatile  
282 ( $\bar{x}(\sigma_{\bar{x}}) = 0.675(0.022)$ ) over stable phases ( $\bar{x}(\sigma_{\bar{x}}) = 0.533(0.022)$ ,  $t(27) = (3.656)$ ,  $p_{\text{holm}} = 0.027$ ).  
283 Accuracy was significantly higher for the social-primary group ( $\bar{x}(\sigma_{\bar{x}}) = 0.629(0.013)$ ), compared with  
284 the individual-primary group ( $\bar{x}(\sigma_{\bar{x}}) = 0.586(0.013)$ ,  $F(1,29) = 5.196$ ,  $p = 0.030$ ,  $\eta_p^2 = 0.152$ ) and no  
285 other main effects or interactions were observed (all  $p > 0.05$ ).

286 *iii. Relationship between accuracy scores and parameters from model-based analyses*

287 A backwards regression with PLA accuracy as the dependent variable, and  $\alpha_{\text{primary}}$  and  $\alpha_{\text{secondary}}$   
 288 (collapsed across volatile and stable phases), initial values  $V_{\text{primary}(i)}$  and  $V_{\text{secondary}(i)}$ ,  $\beta$  and  $\zeta$  as  
 289 predictors, was carried out. PLA accuracy was marginally significantly predicted by a model  
 290 with  $\alpha_{\text{secondary}}$  as a single predictor ( $R = 0.347$ ,  $F(1,29) = 3.981$ ,  $p = 0.055$ ). Under haloperidol, a  
 291 backward regression with HAL accuracy as the dependent variable, and  $\alpha_{\text{primary}}$ ,  $\alpha_{\text{secondary}}$ ,  $V_{\text{primary}(i)}$ ,  
 292  $V_{\text{secondary}(i)}$ ,  $\beta$  and  $\zeta$  as predictors, revealed that HAL accuracy was significantly predicted by the full  
 293 model. Within the model,  $\alpha_{\text{primary}}$  was the only significant predictor (Suppl. Table 2). Removing  
 294 predictors did not significantly improve the fit of the model ( $R^2$  change  $< 0.001$ ,  $F$  change  $(1,25) = -$   
 295  $0.064$ ,  $p = 1.000$ ).

296

297 **Supplemental Table 2**

298

299 Coefficients from regression model with HAL accuracy as the dependent variable.

300

|                             | $\beta$ | $\beta$ (SEM) | standardised<br>$\beta$ | t     | p      |
|-----------------------------|---------|---------------|-------------------------|-------|--------|
| <b>constant</b>             | 0.431   | 0.089         |                         | 4.840 | <0.001 |
| $\alpha_{\text{primary}}$   | 0.195   | 0.077         | 0.431                   | 2.532 | 0.018* |
| $\alpha_{\text{secondary}}$ | 0.076   | 0.119         | 0.127                   | 0.642 | 0.527  |
| $V_{\text{primary}(i)}$     | 0.121   | 0.090         | 0.230                   | 1.342 | 0.192  |
| $V_{\text{secondary}(i)}$   | 0.033   | 0.131         | 0.050                   | 0.249 | 0.806  |
| $\beta$                     | 0.002   | 0.001         | 0.329                   | 1.698 | 0.102  |
| $\zeta$                     | 0.045   | 0.043         | 0.189                   | 1.066 | 0.297  |

301 *Note: \* indicates statistical significance*

302

303 *iv. Go, No-go control task*

304 To further investigate the neurochemical mechanisms underlying the observed decrease in  $\alpha_{\text{primary}}$   
 305 under haloperidol, we measured performance on a probabilistic Go, No-go control task, adapted  
 306 from Frank and colleagues<sup>13</sup> and presented using MATLAB R2017b. Participants were presented with  
 307 4 different stimuli, each with a probabilistic value of reward (80%, 60%, 40%, 20%) and instructed to  
 308 accumulate as many points as possible and to avoid losing points, achieved by selecting or  
 309 withholding a response to the given stimuli. For example, if selected, stimuli A would result in  
 310 gaining a point on 80% of trials and losing a point on 20% of trials. Participants were informed that  
 311 points would be rewarded with monetary compensation; however, due to ethical considerations, all



312 participants were awarded £5 at the end, regardless of task performance. Participants first  
313 completed 4 blocks of a practice stage, where single stimuli were presented (40 trials/block, with  
314 each stimulus presented 10 times per block). Reward feedback was provided, allowing learning of  
315 the probabilistic value of each stimulus. This was followed by 6 testing blocks (40 trials/block)  
316 displaying either single stimuli (training stimuli) or novel pairs of stimuli on each trial, whereby  
317 participants were required to respond based on the *combined* probabilistic value of the pairs.  
318 Testing blocks contained positive pairs with a high associated probabilistic reward value, equal pairs  
319 (equally probable reward value), and negative pairs, with a high probabilistic value for punishment.  
320 Participants could respond via a 'Go' (space bar press) or 'No-Go' (withhold response) response.  
321 Feedback was not provided during testing blocks. In all trials, a fixation cross was presented for 250-  
322 750ms, followed by stimuli presentation for 1000ms and a response period for 250ms. Task  
323 performance was calculated as the difference in 'Go' response for stimuli (novel pairs and single  
324 stimuli) with a high probability of reward under HAL and PLA conditions, for each participant  
325 separately.

326  
327 Previous research (using a similar low, acute dose of haloperidol) resulted in enhancement of  
328 learning from positive reinforcement, indexed by an increase in learning from positive feedback<sup>13</sup>,  
329 suggested to be mediated via pre-synaptic antagonistic effects on phasic dopamine (DA) signalling.  
330 As an exploratory measure, participants were stratified into two subgroups based on performance  
331 during this task; those with a higher change in 'Go' performance for high reward trials under  
332 haloperidol, and those with a lower change in 'Go' performance under haloperidol, relative to  
333 placebo. For the participants who demonstrated increased 'Go' performance under haloperidol ( $n =$   
334  $12$ ), a significant drug by information effect was observed on the main behavioural task ( $F(1,10) =$   
335  $4.773$ ,  $p = 0.054$ ,  $\eta_p^2 = 0.323$ ). However, this effect was not observed in participants with reduced  
336 'Go' performance under haloperidol ( $n = 19$ ;  $F(1,17) = 2.001$ ,  $p = 0.175$ ,  $\eta_p^2 = 0.105$ ). Thus, suggesting  
337 that the observed effect of haloperidol on learning rate for primary information was driven by a  
338 subgroup of participants who exhibited increased 'Go' performance under haloperidol (relative to  
339 placebo). Given that such effects on Go performance have been linked to pre-synaptic antagonistic  
340 effects on phasic DA signalling<sup>13</sup> these results suggest that the effects we observed on  $\alpha_{\text{primary}}$  are  
341 likely mediated by effects of haloperidol on phasic DA signalling.

342  
343 While an increase in Go performance suggests effects of haloperidol on phasic dopamine release,  
344 the effects of haloperidol can also result in a reduction in tonic dopamine signalling<sup>14</sup>. These tonic  
345 effects are commonly indexed by a slowing of response<sup>15,16</sup>. Indeed, haloperidol had a significant

346 effect on (log) reaction time (RT), with higher reaction times observed under haloperidol ( $\bar{x}$  ( $\sigma_{\bar{x}}$ ) =  
347 1.580 (0.147) seconds(s)) when compared with placebo ( $\bar{x}$  ( $\sigma_{\bar{x}}$ ) = 1.242 (0.150),  $p = 0.002$ ,  $\eta^2 =$   
348 0.292). We therefore investigated whether there was a relationship between  $\Delta RT$  and  $\Delta\alpha$  under  
349 haloperidol. A median split ( $\Delta RT$ ) resulted in two subgroups of participants. Separate RM-ANOVAs,  
350 with (square root) learning rate estimates ( $\alpha$ ) as the dependent variable, and information, volatility  
351 and task group as the predictor variables were carried out for each subgroup. For the subgroup of  
352 participants who showed the greatest increase in RT (slowing of response) under haloperidol ( $n=15$ ),  
353 the drug by information interaction no longer reached significance ( $F(1,13) = 0.106$ ,  $p = 0.750$ ,  $\eta_p^2 =$   
354 0.008). The opposite pattern of results was observed for the subgroup of participants ( $n = 16$ ) with a  
355  $\Delta RT$  below the median change (a reduced slowing of response under haloperidol): here a significant  
356 drug by information interaction effect was observed ( $F(1,14) = 10.846$ ,  $p = 0.005$ ,  $\eta_p^2 = 0.437$ ).  
357 Results show that, for the subgroup of participants who showed the greatest slowing of response  
358 ( $\Delta RT$ ), haloperidol did not significantly affect learning rates. Given that response slowing has been  
359 linked to tonic dopamine this pattern of results further reinforces the idea that our observed effects  
360 on  $\alpha_{\text{primary}}$  are likely mediated by effects of haloperidol on phasic, not tonic, DA.

361  
362

#### 363 *v. Effect of randomisation schedule and drug day on model parameters*

364 Randomisation schedule (1-4) and drug day (i.e., haloperidol administered on testing day 1 or 2)  
365 were included as predictor variables in all analyses (with both  $n = 31$  and  $n = 41$  samples), with no  
366 main/interaction effect(s) observed (all  $F < 1$ , all  $p > 0.05$ ). Additionally, testing session was used to  
367 check for the presence of practice effects. Testing session (session 1 or 2) was included as a predictor  
368 variable in all analysis, with no main/interaction effect(s) observed (all  $F < 1$ , all  $p > 0.05$ ).

369  
370

#### 371 *vi. Effects of baseline verbal working memory (VWM) on model parameters*

372 As there is evidence to suggest that effects of dopamine manipulation are dependent on baseline DA  
373 synthesis, with working memory capacity shown to predict dopamine synthesis in healthy adults<sup>17</sup>,  
374 participants completed a visual working memory (VWM) task, adapted from the Sternberg VWM  
375 Task (Sternberg, 1969), and programmed using MATLAB R2017b. Participants were first presented  
376 with instructions followed by practice trials. Upon completion of the practice trials, participants  
377 completed 60 experimental trials across 5 blocks. On each trial, a fixation cross was displayed in the  
378 centre of screen (fixation duration varied randomly between 500-1000 ms). Then participants were  
379 presented with a list of letters, (varying between 5 – 9 consonants in length, with letters randomly  
380 selected from the alphabet on each trial) for 1000 ms, followed by a blue fixation cross for 3000 ms.

381 Following this, a single test letter was displayed (for a maximum of 4000 ms), requiring participants  
382 to determine whether the letter was taken from the previously displayed list. For 50% of trials, the  
383 letter had been present on the previous list and on 50% of trials, it had not. Participants responded  
384 by pressing 1-3 on the keyboard (1 – Yes, 2 - No, 3 – Unsure). The total task duration was  
385 approximately 10 minutes. Responses (accuracy) and response time (time from test letter displayed  
386 until participant response) were recorded for each trial. We then stratified participants into high and  
387 low verbal working memory (VWM) groups, based on mean baseline (under placebo) accuracy  
388 scores. VWM (high/low) was included as a predictor in a mixed model analysis (n = 31). A Type III  
389 RM-ANOVA conducted on model estimates revealed a significant interaction between VWM and  
390 information type ( $F(1,189) = 5.932$ ,  $p = 0.016$ , beta estimate (SE) = 0.026 (0.010),  $t = 2.436$ , CI [0.00 –  
391 0.05]) with planned contrasts revealing that, for low VWM participants,  $\alpha_{secondary}$  values ( $\bar{x}(\sigma_{\bar{x}}) =$   
392 0.364 (0.031) were significantly lower than  $\alpha_{primary}$  values ( $\bar{x}(\sigma_{\bar{x}}) = 0.447$  (0.031);  $z(30) = 2.820$ ,  
393  $p_{holm} = 0.010$ ). There was no significant difference between  $\alpha_{primary}$  and  $\alpha_{secondary}$  for high VWM  
394 participants ( $z(30) = -0.641$ ,  $p_{holm} = 0.522$ ). No other main or interaction effects of VWM on  $\alpha$  values  
395 were observed (all  $F < 0.01$ , all  $p > 0.05$ ). Additionally, the pattern of results was unchanged from the  
396 previous analysis excluding VWM, with the drug by information interaction effect remaining  
397 significant ( $F(1,189) = 3.967$ ,  $p = 0.048$ , beta estimate (SE) = 0.021 (0.010),  $t = 1.992$ , CI [0.00 –  
398 0.04]). Finally, while including baseline VWM as continuous predictor variable in a RM-ANOVA, no  
399 main or interaction effect(s) of VWM on  $\alpha$  values were observed. Additionally, neither gender, age  
400 nor BMI interacted with any outcome variables (all  $F < 0.01$ , all  $p > 0.05$ ). Results suggest that the  
401 observed decrease in  $\alpha_{primary}$  under haloperidol is not related to variation in working memory  
402 capacity.

403

404

405

406

407

408

409

410 **Appendix 5**

411

412 Instruction scripts

413 *i. Individual-primary group*

414

415 Welcome. You have a choice: either choose the blue shape or the green shape. One shape is correct  
416 - guessing which one it is will give you points. To help you to choose, one of the shapes is filled with  
417 red. This indicates the most popular choice selected by a group of 4 people who previously played  
418 this task. When the question mark appears, try picking a shape by pressing the left or right keyboard  
419 buttons. [Participant responds]

420

421 Feedback: After you make a choice, a tick or cross will appear in the middle. This tells you if the  
422 group of previous players were correct or incorrect.

423 Here they think the blue shape (filled with red) will be correct. Try picking a shape now. [Participant  
424 responds]

425

426 Blue is correct! This means that this time the others got it right.

427 Things happen in phases in this game. The game could be in a phase where the blue shape is more  
428 likely to be correct. Have another go. [Participant responds]

429

430 And blue again! It certainly looks as though you are in a blue phase but make sure you pay attention  
431 to what the right answers are because the phase that you are in can change at any time. Here's a tip  
432 - ignore which side of the screen the shapes are on - it's the colour that is important! [Participant  
433 responds]

434

435 The others got it right again. It looks like, right now, you could be in a phase where the group's  
436 information is useful. Perhaps these are trials from the end of their experiment, when they had  
437 developed a pretty good idea of what was going on. Be careful though because we have mixed up  
438 the order of the other people's trials so that their choices will also follow phases. Try again. Perhaps  
439 the other shape is right this time? [Participant responds]

440

441 Green! This time the green shape was right! The chance of each shape being right or wrong will  
442 change as you play, so pay attention! The group were incorrect this time. Remember that sometimes  
443 you will see less useful information from the group - for example from the beginning of their  
444 experiment where they didn't have a very good idea of what was going on. Have another go ...

445 [Participant responds]

446

447 This time the green shape was right! The chance of each shape being right or wrong will change as  
448 you play, so pay attention. The group were correct too. It looks like, right now, you could be in a  
449 phase where the group's information is useful. Try to be as accurate as possible. Getting it right,  
450 gives you points. Get enough points and you could earn a silver or even a gold prize! Have another  
451 go... [Participant responds]

452

453 Things happen in phases in this game. Remember, the tick or cross in the middle tells you if the  
454 group were correct or incorrect. That means that the shape with the red box was the correct choice.

455 Have another go... [Participant responds]

456

457 The group were correct this time. The tick in the middle tells you that they picked the correct choice.  
458 There will now be a short quiz. Pick one more shape and then we'll head to the real game!  
459 [Participant responds]

460  
461 *ii. Social-primary group*  
462

463 Welcome. You have a choice between going with, or against advice from a group. Below you can see  
464 a blue and green frame, one frame is filled with a red box: this indicates the most popular choice  
465 selected by a group of 4 people who previously played this task. One frame is correct. You can pick  
466 the same frame as the group have picked or choose to go against the group's advice. When the  
467 question mark appears, make your selection by pressing the left or right keyboard buttons.  
468 [Participant responds]

469  
470 Feedback: After you make a choice, a tick or cross will appear in the middle. This tells you if the  
471 group of previous players were correct or incorrect.  
472 This time they were correct! This means that the frame filled with the red square was the correct  
473 frame.  
474 Here they think the blue frame (filled with red) will be correct. Try picking a frame now. [Participant  
475 responds]

476  
477 The group were correct! This means that this time the others got it right and picked the correct  
478 colour.  
479 Things happen in phases in this game. The game could be in a phase where the group are more likely  
480 to be correct. Have another go. [Participant responds]

481  
482 The group were correct again! The blue frame was right again. It certainly looks as though you are in  
483 a phase where the group are correct but make sure you pay attention to the feedback because the  
484 phase that you are in can change at any time. Blue and green can also go through phases: it looks  
485 like you might be in a phase where the blue frame is more likely to be correct. Try again. [Participant  
486 responds]

487  
488 The others got it right again. It looks like, right now, you could be in a phase where the group's  
489 information is pretty useful. Perhaps these are trials from the end of their experiment, when they  
490 had developed a pretty good idea of what was going on. Be careful though because we have mixed  
491 up the order of the other people's trials so that their choices will follow phases. Try again.  
492 [Participant responds]

493  
494 The group were incorrect this time. This time the green frame was correct. The chance of each frame  
495 being right or wrong will change as you play, so pay attention! Remember that sometimes you will  
496 see less useful information from the group - for example from the beginning of their experiment  
497 where they didn't have a very good idea of what was going on. Have another go ... [Participant  
498 responds]

499  
500 The group were correct this time. The chance of each frame being right or wrong will change as you  
501 play, so pay attention. Try to be as accurate as possible. Getting it right, gives you points. Get  
502 enough points and you could earn a silver or even a gold prize! Have another go... [Participant  
503 responds]

504  
505 Things happen in phases in this game. Remember, the tick or cross in the middle tells you if the  
506 group were correct or incorrect. That means that the frame filled with the red was the correct  
507 choice. Have another go... [Participant responds]

508  
509  
510  
511  
512  
513  
514  
515  
516  
517  
518  
519  
520  
521  
522  
523  
524  
525  
526  
527  
528  
529  
530  
531  
532  
533

The group were correct this time. The tick in the middle tells you that they picked the correct choice. There will now be a short quiz. Pick one more time and then we'll head to the real game! [Participant responds]

*Feedback Questionnaire*

Participants completed a short feedback questionnaire after the behavioural task, consisting of the following questions:

1. Did you understand what you were required to do?
2. How clear were the task instructions?
3. Did you use the group's suggestions (red shape) to help you to make your decision?
4. Did you pay attention to which colour (blue/green) was more likely to be correct?
5. How difficult did you find the task?

100% of participants said that they understood the task instructions and what they were supposed to do. Participants rated on a 5-point Likert scale how often they i) used the group's suggestions (red shape) to help make their decision, comprising the social rating score, and ii) if they paid attention to the colour of the shape (blue/green) that was correct when making their decision (the individual rating score). Social and individual ratings were submitted to separate one-sample t-tests, to ensure that participants in both the individual-primary and social-primary groups were paying attention to both sources of information. Both social ( $t(42) = 30.765, p < 0.001$ ) and individual ratings ( $t(42) = 29.565, p < 0.001$ ) were significantly greater than zero.

534

535 **Supplemental References**

536

537 1. Baron-Cohen S, Wheelwright S, Skinner R, Martin J, Clubley E. The Autism-Spectrum Quotient  
538 (AQ): Evidence from ... *J Autism Dev Disord*. 2001;31(1):5-17.

539 2. Bagby RM, Taylor GJ, Parker JDA. The twenty-item Toronto Alexithymia scale-II. Convergent,  
540 discriminant, and concurrent validity. *J Psychosom Res*. 1994;38(1):33-40. doi:10.1016/0022-  
541 3999(94)90006-X

542 3. Carver CS, White TL. Behavioral Inhibition, Behavioral Activation, and Affective Responses to  
543 Impending Reward and Punishment: The BIS/BAS Scales. *J Pers Soc Psychol*. 1994;67(2):319-  
544 333. doi:10.1037/0022-3514.67.2.319

545 4. Lovibond PF, Lovibond SH. *Manual for the Depression Anxiety Stress Scales*. 2nd ed.  
546 (Psychology Foundation, ed.); 1995.

547 5. Davis MH. A Multidimensional Approach to Individual Differences in Empathy. *J Pers Soc*  
548 *Psychol*. 1983;44(1):113-126. doi:10.1037/0022-3514.44.1.113

549 6. Beck AT, Steer RA, Brown G. Beck Depression Inventory-II. In: APA PsycTests; 1996.

550 7. Porges SW. Body Perception Questionnaire (BPQ) Manual. *Stress Int J Biol Stress*. 1993;(c):1-  
551 7.

552 8. Watson D, Clark L, Tellegen A. Development and validation of brief measures of positive and  
553 negative affect: the PANAS scales. *J Pers Soc Psychol*. 1988;54(6):1063-1070.  
554 doi:10.1037//0022-3514.54.6.1063.

555 9. Behrens TEJ, Hunt LT, Woolrich MW, Rushworth MFS. Associative learning of social value.  
556 *Nature*. 2008;456(7219):245-249. doi:10.1038/nature07538

557 10. Cook JL, Swart JC, Froböse MI, et al. Catecholaminergic modulation of meta-learning. *Elife*.  
558 2019;8:1-38. doi:10.7554/eLife.51439

559 11. Stephan KE, Penny WD, Daunizeau J, Moran RJ, Friston KJ. Bayesian model selection for group  
560 studies. *Neuroimage*. 2009;46(4):1004-1017. doi:10.1016/j.neuroimage.2009.03.025

561 12. Daunizeau J, Adam V, Rigoux L. VBA: A Probabilistic Treatment of Nonlinear Models for  
562 Neurobiological and Behavioural Data. *PLoS Comput Biol*. 2014;10(1).  
563 doi:10.1371/journal.pcbi.1003441

564 13. Frank MJ, O'Reilly RC. A mechanistic account of striatal dopamine function in human  
565 cognition: psychopharmacological studies with cabergoline and haloperidol. *Behav Neurosci*.  
566 2006;120(3):497-517. doi:10.1037/0735-7044.120.3.497

567 14. Frank MJ, O'Reilly RC. A mechanistic account of striatal dopamine function in human  
568 cognition: Psychopharmacological studies with cabergoline and haloperidol. *Behav Neurosci*.

- 569 2006;120(3):497-517. doi:10.1037/0735-7044.120.3.497
- 570 15. Grace AA. Dopamine. In: *Neuropsychopharmacology: The Fifth Generation of Progress.* ;
- 571 2002:120-132.
- 572 16. Niv Y, Daw ND, Joel D, Dayan P. Tonic dopamine: Opportunity costs and the control of
- 573 response vigor. *Psychopharmacology (Berl)*. 2007;191(3):507-520. doi:10.1007/s00213-006-
- 574 0502-4
- 575 17. Cools R, Gibbs SE, Miyakawa A, Jagust W, D'Esposito M. Working memory capacity predicts
- 576 dopamine synthesis capacity in the human striatum. *J Neurosci*. 2008;28(5):1208-1212.
- 577 doi:10.1523/JNEUROSCI.4475-07.2008
- 578 18. Sternberg S. Memory-scanning: mental processes revealed by reaction-time experiments. *Am*
- 579 *Sci*. 1969;57(4):421-457.
- 580
- 581
